# Supplementary material
Source: Royal Society of Chemistry journal article supplement (doi:10.1039/d5cs01487e)
Supplement: d5cs01487e1.pdf [file d5cs01487e1.pdf]

## Supplementary information

### Harnessing biosynthetic logic for next-generation ADC payloads

Miaomiao Cai,<sup>†a,d</sup> Xinyuan Pan,<sup>†a</sup> Wei Shen,<sup>†a</sup> Sihui Bian,<sup>a</sup> Dongbin Hu,<sup>a,d</sup> Zhao-Xun Liang,<sup>\*c</sup> Yu Tang,<sup>\*a</sup> Xiaohui Fan,<sup>\*a,b,d,e</sup>  
and Guang-Lei Ma<sup>\*a,d,e</sup>

<sup>a</sup> School of Pharmacy, Zhejiang University, Hangzhou 310058, China. E-mail: guangleima@zju.edu.cn, fanxh@zju.edu.cn, yutang@zju.edu.cn

<sup>b</sup> School of Pharmaceutical Sciences, Zhejiang Chinese Medical University, Hangzhou 310053, China. E-mail: fanxh@zju.edu.cn

<sup>c</sup> School of Biological Sciences, Nanyang Technological University, Singapore 637551, Singapore. E-mail: zxliang@ntu.edu.sg

<sup>d</sup> State Key Laboratory of Chinese Medicine Modernization, Innovation Center of Yangtze River Delta, Zhejiang University, Jiaxing 314102, China.

<sup>e</sup> Zhejiang Key Laboratory of Precision Diagnosis and Therapy for Major Gynecological Diseases, Women's Hospital, Zhejiang University School of Medicine, Hangzhou 310006, China.

† These authors contributed equally to this work.

**Table S1. Dataset of 555 clinical ADCs.** Data were integrated from multiple sources, including public clinical trial registries, regulatory filings, and corporate disclosures, to create a comprehensive dataset covering clinical ADCs up to Dec 2025, which supports the analyses conducted in this study.

| No. | ADC Name                             | Current R&D Status | Registration/ Approval Date | Payload compound | Payload Category | Antigen/ Target  | Company/ Organization                                |
|-----|--------------------------------------|--------------------|-----------------------------|------------------|------------------|------------------|------------------------------------------------------|
| 1   | Ado-trastuzumab emtansine (Kadcyla®) | Approved           | 2013-02-22                  | DM1              | Maytansinoid     | HER2; Tubulin    | Genentech; Roche                                     |
| 2   | Becotatug vedotin (Meiyouheng®)      | Approved           | 2025-10-28                  | MMAE             | Auristatin       | EGFR; Tubulin    | Shanghai Miracogen (China); Lepu Biopharma (China)   |
| 3   | Belantamab mafodotin (Blenrep®)      | Approved           | 2020-08-05                  | MMAF             | Auristatin       | BCMA;Tubulin     | GSK; Baxter Oncology GmbH                            |
| 4   | Brentuximab vedotin (Adcetris®)      | Approved           | 2011-08-19                  | MMAE             | Auristatin       | CD30; Tubulin    | Seagen Inc; Imagine Institute; Takeda Pharmaceutical |
| 5   | Moxetumomab pasudotox (Lumoxiti®)    | Approved           | 2018-09-13                  | PE38             | PE38             | EGFR             | Rakuten Medical Inc; Hikma Pharmaceuticals Plc;      |
| 6   | Cetuximab sarotalocan (Akalux®)      | Approved           | 2020-09-25                  | IR700            | Photosensitizers | Trop-2; Topo 1   | Daiichi Sankyo; Astrazeneca                          |
| 7   | Datopotamab deruxtecan (Datroway®)   | Approved           | 2024-12-27                  | Dxd              | Camptothecin     | HER2; Tubulin    | RemeGen (China)                                      |
| 8   | Disitamab Vedotin (Aidixi®)          | Approved           | 2021-06-08                  | MMAE             | Auristatin       | NECTIN4; Tubulin | Agensys Inc; Seagen Inc; Astellas Pharma             |

|    |                                       |          |            |               |               |                             |                                                                                    |
|----|---------------------------------------|----------|------------|---------------|---------------|-----------------------------|------------------------------------------------------------------------------------|
| 9  | Enfortumab vedotin (Padcev®)          | Approved | 2019-12-18 | MMAE          | Auristatin    | HER2; TOP1                  | Daichi Sankyo; Astrazeneca                                                         |
| 10 | Fam-trastuzumab deruxtecan (Enhertu®) | Approved | 2019-12-20 | Dxd           | Camptothecin  | CD33; DNA                   | Pfizer; Wyeth-Ayerst Pharmaceuticals                                               |
| 11 | Gemtuzumab ozogamicin (Mylotarg®)     | Approved | 2008-01-18 | Calicheamicin | Calicheamicin | CD22; DNA                   | Haleon Pharmaceutical (China); Celltech Group plc                                  |
| 12 | Inotuzumab Ozogamicin (Besponsa®)     | Approved | 2017-06-28 | Calicheamicin | Calicheamicin | CD19; DNA                   | Adc Therapeutics Sa; Fondazione Italiana Linfomi Onlus; Istituto Clinico Humanitas |
| 13 | Loncastuximab tesirine (Zynlonta®)    | Approved | 2021-04-23 | PBD           | PBD           | FOLR1; Tubulin              | Immunogen Inc; Abbvie                                                              |
| 14 | Mirvetuximab soravtansine (Elahere®)  | Approved | 2022-11-14 | DM4           | Maytansinoid  | Tubulin; CD79B              | Seagen Inc; Genentech; Roche                                                       |
| 15 | Polatuzumab vedotin (Polivy®)         | Approved | 2019-06-10 | MMAE          | Auristatin    | Trop-2; TOP1                | Immunomedics Inc; Gilead Sciences Inc; Ibc Pharmaceuticals Inc; Unicancer          |
| 16 | Sacituzumab govitecan (Trodelvy®)     | Approved | 2020-04-22 | SN-38         | Camptothecin  | Trop-2; TOP1                | Klus Pharma Inc; Blackstone Life Sciences; Merck Sharp & Dohme LLC                 |
| 17 | Sacituzumab tirumotecan (Jiataile®)   | Approved | 2024-11-22 | KL610023      | Camptothecin  | c-Met; Microtubule proteins | AbbVie                                                                             |

|    |                                            |          |            |                                   |               |               |                                                      |
|----|--------------------------------------------|----------|------------|-----------------------------------|---------------|---------------|------------------------------------------------------|
| 18 | Telisotuzumab vedotin (Emrelis®)           | Approved | 2025-05-14 | MMAE                              | Auristatin    | TF; Tubulin   | Genmab A/S; Zai Lab (China); Baxter Oncology GmbH    |
| 19 | Tisotumab vedotin (Tivdak®)                | Approved | 2021-09-20 | MMAE                              | Auristatin    | HER2; Tubulin | Kelun-Biotech (China); Fudan University; Klus Pharma |
| 20 | Trastuzumab botidotin (舒泰莱®)               | Approved | 2025-10-14 | MMAF                              | Auristatin    | HER2; Tubulin | Zydus Cadila                                         |
| 21 | Trastuzumab emtansine biosimilar (Ujvira®) | Approved | 2021-05-24 | DM1                               | Maytansinoid  | HER2; TOP1    | Jiangsu Hengrui (China); Atridia Pty Ltd             |
| 22 | Trastuzumab rezetecan (Avida®)             | Approved | 2025-05-27 | SHR9265                           | Camptothecin  | CD22          | AstraZeneca                                          |
| 23 | 3H-10000                                   | Phase I  | 2025-10-28 | Undisclosed                       | Undisclosed   | FGFR2b        | 3H Pharmaceuticals (China)                           |
| 24 | ABBV-011                                   | Phase I  | 2018-10-24 | Calicheamicin                     | Calicheamicin | SEZ6; DNA     | AbbVie                                               |
| 25 | ABBV-154                                   | Phase I  | 2022-10-18 | glucocorticoid receptor modulator | GRM           | TNF; GR       | AbbVie                                               |
| 26 | ABBV-319                                   | Phase I  | 2023-04-26 | glucocorticoid receptor modulator | GRM           | GR; CD19      | AbbVie                                               |
| 27 | ABBV-637                                   | Phase I  | 2021-02-23 | BCL-XL inhibitor                  | Bcl-2         | EGFR; Bcl-X   | AbbVie                                               |
| 28 | ABBV-969                                   | Phase I  | 2024-03-08 | A-1770637                         | Camptothecin  | PSMA; STEAP1  | AbbVie                                               |

|    |                                         |         |            |             |              |                                 |                                                       |
|----|-----------------------------------------|---------|------------|-------------|--------------|---------------------------------|-------------------------------------------------------|
| 29 | ADCT-701                                | Phase I | 2024-06-17 | PBD         | PBD          | DLK-1; DNA                      | Adc Therapeutics Sa;<br>Cancer Research<br>Technology |
| 30 | ADCT-901                                | Phase I | 2021-09-09 | PBD         | PBD          | DNA; KAAG1                      | Adc Therapeutics Sa                                   |
| 31 | Ado-trastuzumab<br>emtansine biosimilar | Phase I | 2019-08-13 | DM1         | Maytansinoid | HER2; Tubulin                   | Jiangsu Hengrui (China)                               |
| 32 | ADRX-0405                               | Phase I | 2024-12-30 | Top1 i      | Camptothecin | DNA<br>topoisomerase;<br>STEAP1 | Adcentrx Therapeutics Inc.                            |
| 33 | ADRX-0706                               | Phase I | 2023-09-26 | AP052       | Auristatin   | NECTIN4                         | Adcentrx Therapeutics Inc.                            |
| 34 | AGS-67E                                 | Phase I | 2015-12-03 | MMAE        | Auristatin   | CD37; Tubulin                   | Agensys Inc.                                          |
| 35 | AGX-101                                 | Phase I | 2024-07-22 | AP052       | Auristatin   | TM4SF1; Tubulin                 | Angiex Inc.                                           |
| 36 | AK-138-D-1                              | Phase I | 2025-02-24 | Dxd         | Camptothecin | HER3; TOP1                      | Akeso Biopharma (China)                               |
| 37 | AK-146-D-1                              | Phase I | 2025-07-02 | Undisclosed | Undisclosed  | Trop-2; NECTIN4                 | Akeso Biopharma (China)                               |
| 38 | ALK-202                                 | Phase I | 2025-02-10 | Exatecan    | Camptothecin | EGFR; c-Met                     | Shanghai Allink<br>Biotherapeutics (China)            |
| 39 | ALT-P7                                  | Phase I | 2018-01-11 | MMAE        | Auristatin   | Tubulin; HER2;                  | Alteogen Inc                                          |
| 40 | ALX-2004                                | Phase I | 2025-08-18 | Topo I      | Camptothecin | EGF                             | Alx Oncology Inc                                      |

|    |                                                 |         |            |                |              |               |                                                                                      |
|----|-------------------------------------------------|---------|------------|----------------|--------------|---------------|--------------------------------------------------------------------------------------|
| 41 | AMG-224                                         | Phase I | 2015-11-20 | DM1            | Maytansinoid | BCMA          | Amgen                                                                                |
| 42 | AMT-151                                         | Phase I | 2023-01-25 | DUO-5          | Auristatin   | FOLR1         | Multitude Therapeutics (China)                                                       |
| 43 | AMT-562                                         | Phase I | 2024-02-26 | Exatecan       | Camptothecin | HER3; TOP1    | Multitude Therapeutics (China)                                                       |
| 44 | AMT-676                                         | Phase I | 2024-06-18 | Exatecan       | Camptothecin | CDH17         | Multitude Therapeutics (China)                                                       |
| 45 | AMT-707                                         | Phase I | 2023-08-15 | Exatecan       | Camptothecin | CDH6; TOP1    | Multitude Therapeutics (China)                                                       |
| 46 | AMT-754                                         | Phase I | 2024-08-20 | Exatecan       | Camptothecin | TF; TOP1      | Multitude Therapeutics (China)                                                       |
| 47 | Anti-HER2 monoclonal antibody-MCC-DM1 conjugate | Phase I | 2019-04-01 | DM1            | Maytansinoid | HER2; Tubulin | Shanghai Jiaolian Drug Development (China); Shanghai Pharmaceuticals Holding (China) |
| 48 | Antibody-drug nanocell conjugates               | Phase I | 2016-10-25 | Doxorubicin    | Doxorubicin  | EGFR          | Engeneic Ltd                                                                         |
| 49 | ARX-305                                         | NDA     | 2022-02-15 | Amberstatin269 | Auristatin   | CD70; Tubulin | Ambrx Inc                                                                            |
| 50 | ARX-517                                         | Phase I | 2020-12-10 | Amberstatin269 | Auristatin   | PSMA          | Ambrx Inc                                                                            |
| 51 | ASN-004                                         | Phase I | 2022-04-08 | MMAF           | Auristatin   | TPBG          | Asana Biosciences Llc                                                                |

|    |          |         |            |             |              |                |                                          |
|----|----------|---------|------------|-------------|--------------|----------------|------------------------------------------|
| 52 | AT03-65  | Phase I | 2025-01-15 | TCS132      | TCS132       | CLDN6          | Axcynsis Therapeutics Pte Ltd            |
| 53 | B-0069   | Phase I | 2019-04-11 | DM1         | Maytansinoid | CD30; Tubulin  | Shanghai Pharmaceuticals Holding (China) |
| 54 | BA-1301  | Phase I | 2023-01-11 | Duostatin 5 | Auristatin   | Claudin 18.2   | Shandong Boan Biotech (China)            |
| 55 | BA-1302  | Phase I | 2024-09-11 | BNLD11      | Auristatin   | MELTF          | Shandong Boan Biotech (China)            |
| 56 | BA-3361  | Phase I | 2024-05-06 | MMAE        | Auristatin   | NECTIN4        | Bioatla                                  |
| 57 | BAT-8007 | Phase I | 2023-01-17 | Exatecan    | Camptothecin | TOP1; NECTIN4  | Bio-Thera Solutions (China)              |
| 58 | BAT-8009 | Phase I | 2022-08-02 | Exatecan    | Camptothecin | CD276          | Bio-Thera Solutions (China)              |
| 59 | BB-1705  | Phase I | 2021-12-24 | Eribulin    | Eribulin     | EGFR; Tubulin  | Bliss Biopharmaceutical (China)          |
| 60 | BB-1709  | Phase I | 2022-10-28 | Eribulin    | Eribulin     | NT5E           | Bliss Biopharmaceutical (China)          |
| 61 | BB-1710  | Phase I | 2024-03-21 | Eribulin    | Eribulin     | Updating       | Bliss Biopharmaceutical (China)          |
| 62 | BB-1712  | Phase I | 2025-04-18 | Eribulin    | Eribulin     | CD276; Tubulin | Bliss Biopharmaceutical (China)          |

|    |                        |         |            |                                                 |                               |                           |                                                                                          |
|----|------------------------|---------|------------|-------------------------------------------------|-------------------------------|---------------------------|------------------------------------------------------------------------------------------|
| 63 | BC-2027                | Phase I | 2024-04-08 | Undisclosed                                     | Undisclosed                   | GPC3                      | Wuxi Biocity (China)                                                                     |
| 64 | BC-3195                | Phase I | 2023-03-27 | MMAE                                            | Auristatin                    | CDH3; Tubulin             | Wuxi Biocity (China)                                                                     |
| 65 | BCG-011                | Phase I | 2024-06-26 | MMAE                                            | Auristatin                    | Trop-2; EGFR              | Biocytogen<br>Pharmaceuticals (Beijing)                                                  |
| 66 | Bezetabart debotansine | Phase I | 2018-02-22 | Maytansinoid                                    | Maytansinoid                  | HLA-DR; Tubulin;          | Sutro Biopharma Inc.                                                                     |
| 67 | BG-C137                | Phase I | 2024-12-09 | topoisomerase<br>inhibitor                      | Camptothecin                  | FGFR2                     | BeOne Medicines;                                                                         |
| 68 | BG-C477                | Phase I | 2024-10-03 | Topo1                                           | Camptothecin                  | CEA; DNA<br>topoisomerase | BeOne Medicines                                                                          |
| 69 | BGB-C354               | Phase I | 2024-07-08 | Topo1                                           | Camptothecin                  | CD276; TOP1               | BeOne Medicines                                                                          |
| 70 | BHV-1400               | Phase I | 2025-07-30 | ASGPR-mediated<br>hepatocyte<br>internalization | Immunoglobulin A<br>degraders | IgA                       | Biohaven Ltd                                                                             |
| 71 | BL-B16D1               | Phase I | 2024-06-27 | MMAE                                            | Auristatin                    | EGFR; HER3                | Baili Bio Chengdu<br>Pharmaceutical (China);<br>Sichuan Baili<br>Pharmaceuticals (China) |
| 72 | BL-M05D1               | Phase I | 2024-04-19 | Ed-04                                           | Camptothecin                  | Claudin 18.2              | Sichuan Baili<br>Pharmaceuticals (China);<br>SystImmune                                  |

|    |           |         |            |                |                |               |                                                                                          |
|----|-----------|---------|------------|----------------|----------------|---------------|------------------------------------------------------------------------------------------|
| 73 | BL-M09D1  | Phase I | 2025-04-16 | Ed-04          | Camptothecin   | Updating      | Sichuan Biokin<br>Pharmaceutical (China)                                                 |
| 74 | BL-M11D1  | Phase I | 2023-08-02 | Ed-04          | Camptothecin   | CD33          | Baili Bio Chengdu<br>Pharmaceutical (China);<br>Sichuan Baili<br>Pharmaceuticals (China) |
| 75 | BL-M14D1  | Phase I | 2024-08-02 | Ed-04          | Camptothecin   | DLL3          | Baili Bio Chengdu<br>Pharmaceutical (China);<br>Sichuan Baili<br>Pharmaceuticals (China) |
| 76 | BL-M17D1  | Phase I | 2024-07-24 | MMAE           | Auristatin     | HER2          | Baili Bio Chengdu<br>Pharmaceutical (China);<br>Sichuan Baili<br>Pharmaceuticals (China) |
| 77 | BL-M19D1  | Phase I | 2024-11-25 | Undisclosed    | Undisclosed    | Trop-2        | Sichuan Biokin<br>Pharmaceutical (China)                                                 |
| 78 | BPT-567   | Phase I | 2024-10-15 | IL18R1 agonist | IL-18R agonist | PD-1; IL18R   | Bright Peak Therapeutics<br>Inc.                                                         |
| 79 | BR-111    | Phase I | 2025-04-01 | Eribulin       | Eribulin       | Tubulin; ROR1 | BioRay Biopharmaceutical<br>(China)                                                      |
| 80 | BR-111A   | Phase I | 2025-03-04 | Undisclosed    | Undisclosed    | ROR1          | BioRay Biopharmaceutical<br>(China)                                                      |
| 81 | BYON-3521 | Phase I | 2022-03-21 | seco-DUBA      | Duocarmycin    | c-Met         | Byondis Bv                                                                               |

|    |                       |         |            |                         |              |               |                                         |
|----|-----------------------|---------|------------|-------------------------|--------------|---------------|-----------------------------------------|
| 82 | BYON-4413             | Phase I | 2024-06-25 | duocarmazine            | Duocarmycin  | IL3RA         | Byondis Bv                              |
| 83 | Cofetuzumab Pelidotin | Phase I | 2014-10-17 | Aur0101                 | Auristatin   | Tubulin; PTK7 | AbbVie; Stemcentrx Inc.                 |
| 84 | CPO-204               | Phase I | 2022-11-29 | Undisclosed             | Undisclosed  | HER2; Tubulin | CSPC (China)                            |
| 85 | CX-2051               | Phase I | 2024-01-24 | Camptothecin Derivative | Camptothecin | EpCAM; TOP1   | Cytomx Therapeutics Inc; Immunogen Inc. |
| 86 | DAY-301               | Phase I | 2024-11-18 | Exatecan                | Camptothecin | PTK7          | Shanghai Markus Biomedical (China)      |
| 87 | DB-1202               | Phase I | 2022-04-24 | Undisclosed             | Undisclosed  | Updating      | Duality Biologics (China)               |
| 88 | DB-1312               | Phase I | 2024-04-12 | P1021                   | Camptothecin | VTCN1         | Duality Biologics (China)               |
| 89 | DB-1317               | Phase I | 2025-09-23 | P1003                   | Camptothecin | ADAM9         | Duality Biologics (China)               |
| 90 | DB-2304               | Phase I | 2024-10-04 | GR agonist              | GRM          | CLEC4C        | Duality Biologics (China)               |
| 91 | DM-002                | Phase I | 2025-02-17 | BLD1002                 | Auristatin   | MUC1; HER3    | D2M Biotherapeutics (China)             |
| 92 | DM-005                | Phase I | 2024-10-31 | BLD1002                 | Auristatin   | EGFR; TOP1    | Doma Biopharmaceutical (China)          |
| 93 | DS-001                | Phase I | 2023-06-13 | Undisclosed             | Undisclosed  | Trop-2        | Dashi Pharmaceutical (Guangdong)        |
| 94 | DXC-005               | Phase I | 2022-07-15 | Tub201                  | Tubulysin    | MUC1          | Hangzhou DAC Biotechnology (China)      |
| 95 | DXC-006               | Phase I | 2024-01-24 | CPT113                  | Camptothecin | TOP1; NCAM1   | Hangzhou DAC Biotechnology (China)      |

|     |                     |         |            |             |              |                              |                                           |
|-----|---------------------|---------|------------|-------------|--------------|------------------------------|-------------------------------------------|
| 96  | DXC-007             | Phase I | 2022-07-07 | Tub255      | Tubulysin    | CD33; Tubulin                | Hangzhou DAC<br>Biotechnology (China)     |
| 97  | DXC-008             | Phase I | 2025-05-15 | Tubulysin B | Tubulysin    | STEAP1; PSMA                 | Hangzhou DAC<br>Biotechnology (China)     |
| 98  | DXC-009             | Phase I | 2023-02-20 | Undisclosed | Undisclosed  | BCMA                         | Hangzhou DAC<br>Biotechnology (China)     |
| 99  | DXC-014             | Phase I | 2025-09-08 | Top1 i      | Camptothecin | CD276; PSMA;<br>TOP1         | Hangzhou DAC<br>Biotechnology (China)     |
| 100 | DXC-1002            | Phase I | 2024-01-24 | CPT113      | Camptothecin | TOP1; Trop-2                 | Hangzhou DAC<br>Biotechnology (China)     |
| 101 | DXC004A             | Phase I | 2022-11-04 | Tubulysin B | Tubulysin    | EGFR                         | Hangzhou DAC<br>Biotechnology (China)     |
| 102 | EBC-129             | Phase I | 2023-04-28 | MMAE        | Auristatin   | CEACAM6;<br>CEACAM5; Tubulin | Experimental Drug<br>Development Centre   |
| 103 | Emiltatug Ledadotin | Phase I | 2022-08-15 | AF-HPA      | Auristatin   | Tubulin; VTCN1               | Mersana Therapeutics Inc.                 |
| 104 | ESG-406             | Phase I | 2025-04-22 | Undisclosed | Undisclosed  | Updating                     | Shanghai Escugen<br>Biotechnology (China) |
| 105 | ETx-22              | Phase I | 2024-03-05 | Exatecan    | Camptothecin | NECTIN4                      | Emergence Therapeutics<br>AG              |

|     |                                    |         |            |                |              |                  |                                                      |
|-----|------------------------------------|---------|------------|----------------|--------------|------------------|------------------------------------------------------|
| 106 | EVOLVE 104 antibody-drug conjugate | Phase I | 2025-08-15 | CD2 agonist    | CD2 agonist  | RAET1L; ULBP2    | EvolveImmune Therapeutics Inc.                       |
| 107 | Felmetatug vedotin                 | Phase I | 2022-01-12 | MMAE           | Auristatin   | Tubulin; VTCN1   | Seagen Inc.                                          |
| 108 | FPI-2068                           | Phase I | 2023-04-12 | 225Ac          | Radionuclide | EGFR; c-Met      | Fusion Pharmaceuticals Inc; AstraZeneca              |
| 109 | FZ-AD004                           | Phase I | 2023-08-01 | BB05           | Camptothecin | Trop-2           | Shanghai Fudan Zhangjiang Bio Pharmaceutical (China) |
| 110 | FZ-AD005                           | Phase I | 2024-07-03 | DXd            | Camptothecin | DLL3; TOP1       | Shanghai Fudan Zhangjiang Bio Pharmaceutical (China) |
| 111 | GB-251                             | Phase I | 2018-05-08 | MMAE           | Auristatin   | Tubulin; HER2    | Genor Biopharma (China)                              |
| 112 | GenSci-139                         | Phase I | 2025-10-24 | Top1   GSC5181 | Camptothecin | EGFR; HER2; TOP1 | Changchun GeneScience Pharmaceuticals (China)        |
| 113 | GenSci-143                         | Phase I | 2025-10-31 | Top1   GSC5181 | Camptothecin | CD276; PSMA      | Changchun GeneScience Pharmaceuticals (China)        |
| 114 | GR-1017                            | Phase I | 2025-01-13 | Top1           | Camptothecin | FGFR3; TOP1      | GeneQuantum (China); Aimed Bio Inc.                  |
| 115 | HBM-9033                           | Phase I | 2023-08-28 | Top1 i         | Camptothecin | MSLN             | Nona Biosciences (China)                             |

|     |          |         |            |                |              |              |                                                                             |
|-----|----------|---------|------------|----------------|--------------|--------------|-----------------------------------------------------------------------------|
| 116 | HDM-2012 | Phase I | 2025-06-30 | Top1 i         | Camptothecin | MUC17        | Hangzhou Zhongmei Huadong Pharmaceutical (China)                            |
| 117 | HDM-2017 | Phase I | 2025-09-22 | CPT derivative | Camptothecin | CDH17        | Hangzhou Zhongmei Huadong Pharmaceutical (China)                            |
| 118 | HDM-2020 | Phase I | 2025-07-14 | Top1 i         | Camptothecin | FGFR2b       | Hangzhou Zhongmei Huadong Pharmaceutical (China)                            |
| 119 | HLX-42   | Phase I | 2023-10-27 | Topo1          | Camptothecin | EGFR; TOP1   | Shanghai Henlius Biotech (China)                                            |
| 120 | HS-20110 | Phase I | 2025-01-14 | Topo1          | Camptothecin | CDH17        | Shanghai Hansoh Biomedical (China); Changzhou Hansoh Pharmaceutical (China) |
| 121 | HS-20122 | Phase I | 2025-04-29 | Undisclosed    | Undisclosed  | EGFR; c-Met  | Shanghai Hansoh Biomedical (China)                                          |
| 122 | HS-20124 | Phase I | 2024-10-30 | SHR9265        | Camptothecin | CDH6; Trop-2 | Hansoh BioMedical R&D Company                                               |
| 123 | HY-0001  | Phase I | 2025-08-28 | MMAE           | Auristatin   | Updating     | Sichuan Huiyu Pharmaceutical (China)                                        |
| 124 | IBI-3001 | Phase I | 2025-01-10 | Topo/Exatecan  | Camptothecin | CD276; EGFR  | Innovent Biologics (China)                                                  |

|     |                                         |         |            |                   |              |                    |                                           |
|-----|-----------------------------------------|---------|------------|-------------------|--------------|--------------------|-------------------------------------------|
| 125 | IBI-3005                                | Phase I | 2025-01-08 | Camptothecin      | Camptothecin | TOP1; HIF1A        | Innovent Biologics (China)                |
| 126 | IBI-3007                                | Phase I | 2025-03-04 | TLR7/8 agonist    | TLR          | Trop-2; TLR7; TLR8 | Innovent Biologics (China)                |
| 127 | IBI-3009                                | Phase I | 2024-12-04 | Undisclosed       | Undisclosed  | DLL3; TOP1         | Innovent Biologics (China)                |
| 128 | IBI-3010                                | Phase I | 2025-01-26 | NT1               | Camptothecin | TOP1; FOLR1        | Innovent Biologics (China)                |
| 129 | IBI-3020                                | Phase I | 2025-04-17 | Undisclosed       | Undisclosed  | CEACAM5            | Innovent Biologics (China)                |
| 130 | ICP-B794                                | Phase I | 2025-07-03 | TOP1 i            | Camptothecin | CD276              | InnoCare Pharma                           |
| 131 | IKS-03                                  | Phase I | 2023-09-05 | PBD               | PBD          | CD19               | Legochem Biosciences Inc;<br>Novimmune Sa |
| 132 | IMGN-151                                | Phase I | 2023-01-11 | DM21              | Maytansinoid | FOLR1; Tubulin     | Immunogen Inc.                            |
| 133 | INA-03                                  | Phase I | 2020-05-29 | MMAE              | Auristatin   | TfR1; Tubulin      | Inatherys                                 |
| 134 | Indium-111-DOTA-girentuximab-IRDye800CW | Phase I | 2015-06-01 | <sup>111</sup> In | Radionuclide | CA9                | Radboud University Nijmegen               |
| 135 | IPH-4502                                | Phase I | 2024-09-23 | Exatecan          | Camptothecin | TOP1; NECTIN4      | Innate Pharma SA                          |
| 136 | JNJ-89862175                            | Phase I | 2025-10-10 | Undisclosed       | Undisclosed  | ENPP3              | Janssen Research & Development Llc        |

|     |                       |         |            |                         |              |                           |                                                       |
|-----|-----------------------|---------|------------|-------------------------|--------------|---------------------------|-------------------------------------------------------|
| 137 | JS-107                | Phase I | 2022-03-29 | MMAE                    | Auristatin   | Claudin 18.2              | Shanghai Junshi Biosciences (China)                   |
| 138 | JS-108                | Phase I | 2020-10-28 | Tub196                  | Tubulysin    | Trop-2; Tubulin           | Hangzhou DAC Biotechnology (China)                    |
| 139 | JSKN-022              | Phase I | 2025-10-14 | Alphatecan              | Camptothecin | TOP1; PD-L1; ITGB6; ITGB8 | Alphamab Oncology (China)                             |
| 140 | KH-815                | Phase I | 2025-04-30 | TOP1 and RNA POL II     | Camptothecin | Trop-2                    | Chengdu Kanghong Biotechnology (China)                |
| 141 | LCB-71                | Phase I | 2022-01-03 | PBD                     | PBD          | ROR1; DNA                 | Legochem Biosciences Inc; Abl Bio Inc.                |
| 142 | LFD-200               | Phase I | 2025-10-06 | GR regulator            | GRM          | VISTA                     | Lifordi Immunotherapeutics Inc;                       |
| 143 | LNCB-74               | Phase I | 2025-01-07 | MMAE                    | Auristatin   | VTCN1; DNA                | Nextcure Inc; LigaChem Biosciences Inc.               |
| 144 | Losatuxizumab vedotin | Phase I | 2015-01-09 | MMAE                    | Auristatin   | EGFR; Tubulin             | AbbVie                                                |
| 145 | Lupartumab amadotin   | Phase I | 2014-05-22 | Auristatin W Derivative | Auristatin   | LYPD3; Tubulin            | Bayer                                                 |
| 146 | LY-4175408            | Phase I | 2025-07-28 | Exatecan                | Camptothecin | PTK7; TOP1                | Lilly                                                 |
| 147 | M-1231                | Phase I | 2021-01-13 | SC209                   | Hemiasterlin | EGFR; MUC1                | Emd Serono Research & Development Institute Inc;Merck |

|     |                        |         |            |             |              |              |                                         |
|-----|------------------------|---------|------------|-------------|--------------|--------------|-----------------------------------------|
| 148 | M-3554                 | Phase I | 2024-11-08 | Exatecan    | Camptothecin | GD2; TOP1    | Merck                                   |
| 149 | MEDI-2228              | Phase I | 2018-05-08 | PBD         | PBD          | BCMA         | Medimmune Llc.                          |
| 150 | MG-1901                | Phase I | 2022-12-01 | Undisclosed | Undisclosed  | Updating;    | Shanghai MabGen Biotech (China)         |
| 151 | MG-2001                | Phase I | 2022-12-01 | Undisclosed | Undisclosed  | Updating;    | Shanghai MabGen Biotech (China)         |
| 152 | MG-2002A               | Phase I | 2022-12-01 | Undisclosed | Undisclosed  | Updating;    | Shanghai MabGen Biotech (China)         |
| 153 | MGC-026                | Phase I | 2024-03-06 | Exatecan    | Camptothecin | TOP1; CD276  | Macrogenics Inc.                        |
| 154 | MGC-028                | Phase I | 2025-02-13 | Exatecan    | Camptothecin | ADAM9; TOP1  | Macrogenics Inc.                        |
| 155 | MHB-009C               | Phase I | 2025-01-03 | Undisclosed | Undisclosed  | VTCN1; TOP1  | Minghui Pharmaceutical (China)          |
| 156 | Mirzotamab clezutoclax | Phase I | 2018-07-13 | Clezutoclax | Bcl-2        | CD276; Bcl-X | AbbVie                                  |
| 157 | MK-6204                | Phase I | 2024-12-12 | Undisclosed | Undisclosed  | Updating     | Sichuan Kelun Botai Biomedicine (China) |
| 158 | MRG001                 | Phase I | 2019-05-05 | MMAE        | Auristatin   | CD20         | Shanghai Miracogen (China);             |
| 159 | MYTX-011               | Phase I | 2023-03-23 | MMAE        | Auristatin   | c-Met        | Mythic Therapeutics Inc.                |

|     |                                              |         |            |             |                |                |                                                   |
|-----|----------------------------------------------|---------|------------|-------------|----------------|----------------|---------------------------------------------------|
| 160 | NBT-508                                      | Phase I | 2021-02-10 | Undisclosed | Undisclosed    | CD79B          | NewBio Therapeutics (China); Tot Biopharm (China) |
| 161 | NC-18                                        | Phase I | 2024-02-05 | MMAF        | Auristatin     | HER2           | Novacyte Therapeutics (China)                     |
| 162 | Nectin-4 targeting antibody drug conjugate 1 | Phase I | 2025-03-01 | Undisclosed | Undisclosed    | NECTIN4        | Lilly                                             |
| 163 | Nectin-4 targeting antibody drug conjugate 2 | Phase I | 2025-03-01 | Undisclosed | Undisclosed    | NECTIN4        | Lilly                                             |
| 164 | NN-3201                                      | Phase I | 2025-02-03 | MMAE        | Auristatin     | KIT; Tubulin   | Novelty Nobility Inc                              |
| 165 | Oba-01                                       | Phase I | 2023-12-13 | MMAE        | Auristatin     | DR5            | Yantai Heyuan Aidis Biomedical Technology (China) |
| 166 | Oberotatug ravtansine                        | Phase I | 2017-08-28 | DM4         | Maytansinoid   | LY75; Tubulin  | Oxford Biotherapeutics Ltd; Menarini              |
| 167 | OMTX-705                                     | Phase I | 2022-10-20 | TAM470      | Maytansinoid   | Tubulin; FAP   | Oncomatrix Biopharma SI                           |
| 168 | ORM-6151                                     | Phase I | 2023-11-06 | SMol006     | GSPT1 degrader | GSPT1; CD33    | Orum Therapeutics Inc.                            |
| 169 | PF-08046031                                  | Phase I | 2025-05-01 | MMAE        | Auristatin     | MELTF; Tubulin | Pfizer                                            |
| 170 | PF-08046032                                  | Phase I | 2025-05-08 | MMAE        | Auristatin     | IL2RA; Tubulin | Pfizer                                            |

|     |                                                     |         |            |             |              |               |                                                                         |
|-----|-----------------------------------------------------|---------|------------|-------------|--------------|---------------|-------------------------------------------------------------------------|
| 171 | PF-08046876                                         | Phase I | 2025-08-20 | AMDCPT      | Camptothecin | ITGB6; TOP1   | Pfizer                                                                  |
| 172 | PHN-010                                             | Phase I | 2024-07-01 | Undisclosed | Undisclosed  | Updating      | Pheon Therapeutics Ltd                                                  |
| 173 | PHN-012                                             | Phase I | 2025-09-23 | Undisclosed | Undisclosed  | Updating      | Pheon Therapeutics Inc.                                                 |
| 174 | PM1300                                              | Phase I | 2025-06-20 | Undisclosed | Undisclosed  | EGFR; HER3    | Biotheus (China)                                                        |
| 175 | QLS-5132                                            | Phase I | 2025-05-01 | Undisclosed | Undisclosed  | CLDN6         | Qilu Pharmaceutical (China)                                             |
| 176 | RC-248                                              | Phase I | 2024-01-09 | Undisclosed | Undisclosed  | DR5           | RemeGen (China)                                                         |
| 177 | Recombinant anti-HER2 human monoclonal antibody-DM1 | Phase I | 2019-06-18 | DM1         | Maytansinoid | Tubulin; HER2 | Zhejiang Hisun Pharmaceutical (China); Beijing Mabworks Biotech (China) |
| 178 | RG-6148                                             | Phase I | 2018-04-17 | PBD         | PBD          | HER2          | Genentech, Roche                                                        |
| 179 | SBO-154                                             | Phase I | 2025-07-17 | Undisclosed | Undisclosed  | MUC1          | Sun Pharmaceutical Advanced Research Co Ltd                             |
| 180 | Serclutamab talirine                                | Phase I | 2017-10-10 | SGD-1882    | PBD          | DNA; EGFR     | AbbVie                                                                  |
| 181 | SG-2918                                             | Phase I | 2023-12-26 | Undisclosed | Undisclosed  | Tubulin       | Hangzhou Shangjian Biotechnology (China)                                |
| 182 | SGN-35C                                             | Phase I | 2024-05-28 | Undisclosed | Undisclosed  | TOP1; CD30    | Seagen Inc.                                                             |

|     |              |         |            |                         |              |                   |                                                   |
|-----|--------------|---------|------------|-------------------------|--------------|-------------------|---------------------------------------------------|
| 183 | SGN-35T      | Phase I | 2024-02-29 | Undisclosed             | Undisclosed  | HIF1A; TOP1; CD30 | Seagen Inc.                                       |
| 184 | SGN-CEACAM5C | Phase I | 2023-11-20 | Undisclosed             | Undisclosed  | CEACAM5; TOP1     | Seagen Inc; Sanofi                                |
| 185 | SGN-STNV     | Phase I | 2020-12-14 | MMAE                    | Auristatin   | Tubulin           | Seagen Inc.                                       |
| 186 | SHR-1904     | Phase I | 2022-08-24 | Undisclosed             | Undisclosed  | HER2              | Jiangsu Hengrui (China)                           |
| 187 | SHR-4394     | Phase I | 2025-01-22 | Undisclosed             | Undisclosed  | Updating          | Jiangsu Hengrui (China)                           |
| 188 | SIBP-A13     | Phase I | 2023-09-19 | DXd                     | Camptothecin | HER3              | Shanghai Institute of Biological Products (China) |
| 189 | SIBP-A17     | Phase I | 2024-07-11 | DXd                     | Camptothecin | HER2              | Shanghai Institute of Biological Products (China) |
| 190 | SIBP-A18     | Phase I | 2025-06-15 | DXd                     | Camptothecin | Claudin 18.2      | Shanghai Institute of Biological Products (China) |
| 191 | SIBP-A19     | Phase I | 2025-05-21 | DXd                     | Camptothecin | Updating          | Shanghai Institute of Biological Products (China) |
| 192 | SIM-0505     | Phase I | 2025-02-26 | Camptothecin Derivative | Camptothecin | CDH6; TOP1        | Simcere Zaiming Pharmaceutical (China)            |
| 193 | SIM-0609     | Phase I | 2025-09-05 | CPT116                  | Camptothecin | CDH17; TOP1       | Simcere (China)                                   |
| 194 | SIM-0686     | Phase I | 2025-04-08 | Camptothecin Derivative | Camptothecin | FGFR2             | Simcere Zaiming Pharmaceutical (China)            |

|     |          |         |            |                  |                 |               |                                                                                     |
|-----|----------|---------|------------|------------------|-----------------|---------------|-------------------------------------------------------------------------------------|
| 195 | SKB-445  | Phase I | 2025-02-05 | Undisclosed      | Undisclosed     | Updating      | Sichuan Kelun Botai Biomedicine (China)                                             |
| 196 | SKB-500  | Phase I | 2024-12-13 | Undisclosed      | Undisclosed     | CD276         | Sichuan Kelun Botai Biomedicine (China)                                             |
| 197 | SKB-501  | Phase I | 2024-11-25 | Undisclosed      | Undisclosed     | Updating      | Sichuan Kelun Botai Biomedicine (China)                                             |
| 198 | SMP-656  | Phase I | 2024-02-01 | Eribulin         | Eribulin        | HER2; Tubulin | Xiling Lab (China)                                                                  |
| 199 | SN-001   | Phase I | 2024-04-09 | Undisclosed      | Undisclosed     | Updating      | Sinoway (China)                                                                     |
| 200 | STX-0712 | Phase I | 2025-03-13 | CCR2 antagonists | CCR2 antagonist | CCR2          | Solu Therapeutics Inc.                                                              |
| 201 | SYD-1875 | Phase I | 2020-02-28 | seco-DUBA        | Duocarmycin     | TPBG          | Synthon Bv                                                                          |
| 202 | SYHD001  | Phase I | 2024-07-16 | MMAE             | Auristatin      | Updating      | Sanyou Biopharmaceuticals (China); Hangzhou Zhongmei Huadong Pharmaceutical (China) |
| 203 | SYS-6005 | Phase I | 2025-03-31 | MMAE             | Auristatin      | ROR1; Tubulin | CSPC (China)                                                                        |
| 204 | SYS-6023 | Phase I | 2024-07-08 | Undisclosed      | Undisclosed     | HER3          | CSPC Megalith Biopharmaceutial (China)                                              |

|     |                      |         |            |             |              |                         |                                                     |
|-----|----------------------|---------|------------|-------------|--------------|-------------------------|-----------------------------------------------------|
| 205 | SYS-6040             | Phase I | 2025-03-20 | Undisclosed | Undisclosed  | HER2; Tubulin;<br>DLL3  | CSPC Megalith<br>Biopharmaceutical (China)          |
| 206 | SYS-6041             | Phase I | 2025-03-28 | Undisclosed | Undisclosed  | HER2; Tubulin;<br>FOLR1 | CSPC Megalith<br>Biopharmaceutical (China)          |
| 207 | T-320                | Phase I | 2024-11-12 | Undisclosed | Undisclosed  | Updating                | Nanolattix Biotechnology<br>(China)                 |
| 208 | TGW-101              | Phase I | 2025-05-07 | MMAE        | Auristatin   | TAG-72; Tubulin         | Tagworks Pharmaceuticals<br>BV                      |
| 209 | Tilatamig samrotecan | Phase I | 2022-12-22 | AZ14170132  | Camptothecin | EGFR; c-Met; TOP1       | AstraZeneca                                         |
| 210 | TJ-101               | Phase I | 2025-07-01 | PY-4CAR2    | Camptothecin | EGFR; CD276; TOP1       | Phrontline Biopharma<br>(China)                     |
| 211 | TORL-2-307-ADC       | Phase I | 2022-02-02 | MMAE        | Auristatin   | Claudin 18.2            | Torl Biotherapeutics LLC                            |
| 212 | TORL-3-600           | Phase I | 2023-09-29 | MMAE        | Auristatin   | Tubulin; CDH17          | Torl Biotherapeutics LLC                            |
| 213 | TORL-4-500           | Phase I | 2023-12-04 | MMAR        | Auristatin   | TAA                     | Torl Biotherapeutics LLC                            |
| 214 | TQB-2101             | Phase I | 2025-04-01 | Dxd         | Camptothecin | ROR1                    | Nanjing Chia Tai Tianqing<br>Pharmaceutical (China) |
| 215 | TQB-2103             | Phase I | 2023-07-04 | Dxd         | Camptothecin | Claudin 18.2            | Nanjing Chia Tai Tianqing<br>Pharmaceutical (China) |

|     |                         |         |            |                              |              |                       |                                                    |
|-----|-------------------------|---------|------------|------------------------------|--------------|-----------------------|----------------------------------------------------|
| 216 | TQB-6411                | Phase I | 2025-06-13 | Dxd                          | Camptothecin | EGFR; c-Met           | Nanjing Chia Tai Tianqing Pharmaceutical (China);  |
| 217 | Trastuzumab imbotolimod | Phase I | 2023-08-01 | Immunostimulants/TLR agonist | Undisclosed  | HER2                  | Bolt Biotherapeutics Inc.                          |
| 218 | TRPH-222                | Phase I | 2018-10-15 | DM1                          | Maytansinoid | CD22                  | Catalent Inc.                                      |
| 219 | VIP943                  | Phase I | 2023-09-13 | KSPi                         | KSPi         | IL3RA                 | Bayer                                              |
| 220 | XB-002                  | Phase I | 2021-06-07 | MMAE                         | Auristatin   | TF                    | Iconic Therapeutics Inc.                           |
| 221 | XB-010                  | Phase I | 2024-08-06 | MMAE                         | Auristatin   | TPBG                  | Exelixis Inc.                                      |
| 222 | XB-371                  | Phase I | 2025-08-18 | KSPi                         | KSPi         | DNA topoisomerase; TF | Catalent Inc; Exelixis Inc.                        |
| 223 | XMT-2056                | Phase I | 2023-01-24 | STING agonist-20             | STING        | STING; HER2           | Mersana Therapeutics Inc.                          |
| 224 | XZP-KM501               | Phase I | 2023-03-02 | MMAE                         | Auristatin   | HER2; Tubulin         | Shandong Xuanzhu Pharmaceutical Technology (China) |
| 225 | YL-203                  | Phase I | 2024-01-01 | Camptothecin                 | Camptothecin | TOP1                  | Suzhou Medilink Therapeutics (China)               |
| 226 | YL-204                  | Phase I | 2024-01-01 | Camptothecin                 | Camptothecin | TOP1                  | Suzhou Medilink Therapeutics (China)               |

|     |                       |          |            |                  |              |               |                                       |
|-----|-----------------------|----------|------------|------------------|--------------|---------------|---------------------------------------|
| 227 | YL-211                | Phase I  | 2024-05-01 | Camptothecin     | Camptothecin | c-Met         | Suzhou Medilink Therapeutics (China)  |
| 228 | YL-215                | Phase I  | 2024-01-01 | Topo1            | Camptothecin | MSLN          | Suzhou Medilink Therapeutics (China)  |
| 229 | YL-217                | Phase I  | 2025-07-02 | Camptothecin     | Camptothecin | TOP1; CDH17   | Suzhou Medilink Therapeutics (China)  |
| 230 | YL-221                | Phase I  | 2024-01-01 | Camptothecin     | Camptothecin | EGFR          | Suzhou Medilink Therapeutics (China). |
| 231 | YL-222                | Phase I  | 2024-01-01 | YL0010014        | Camptothecin | PD-L1         | Suzhou Medilink Therapeutics (China). |
| 232 | Zanidatamab zovodotin | Phase I  | 2019-04-15 | MMAE             | Auristatin   | HER2; Tubulin | Zymeworks Inc.                        |
| 233 | ZPC-21                | Phase I  | 2025-02-26 | HC74             | HC74         | ROR1; TOP1    | Zentalis Pharmaceuticals Inc.         |
| 234 | ZV-0203               | Phase I  | 2021-12-17 | Duostatin-5/MMAF | Auristatin   | HER2; Tubulin | Hangzhou Adcoris Biopharmacy (China)  |
| 235 | ZW-191                | Phase I  | 2024-07-25 | ZD06519          | Camptothecin | TOP1; FOLR1   | Zymeworks Inc.                        |
| 236 | ZW-251                | Phase I  | 2025-09-01 | ZD06519          | Camptothecin | GPC3; TOP1    | Zymeworks Inc.                        |
| 237 | 7MW-3711              | Phase II | 2023-08-28 | Mtoxin           | Camptothecin | CD276; TOP1   | Mabwell (Shanghai) Bioscience (China) |

|     |                                         |           |            |                              |              |               |                                                                                |
|-----|-----------------------------------------|-----------|------------|------------------------------|--------------|---------------|--------------------------------------------------------------------------------|
| 238 | 7MW-4911                                | Phase II  | 2025-09-24 | MF-6                         | Camptothecin | CDH17; TOP1   | Mabwell (Shanghai)<br>Bioscience (China)                                       |
| 239 | 89Zr-Patritumab<br>deruxtecan           | Phase II  | 2025-03-03 | Exatecan                     | Camptothecin | HER3; TOP1    | Daiichi Sankyo; The<br>Netherlands Cancer<br>Institute; Daiichi Sankyo<br>Inc. |
| 240 | 9MW-2921                                | Phase II  | 2023-08-28 | Mtoxin                       | Camptothecin | TOP1; Trop-2  | Mabwell (Shanghai)<br>Bioscience (China)                                       |
| 241 | ABBV-3373                               | Phase II  | 2019-03-27 | GRM                          | GRM          | TNF           | AbbVie                                                                         |
| 242 | ABBV-706                                | Phase III | 2025-08-28 | A-1743332                    | Camptothecin | SEZ6; TOP1    | AbbVie                                                                         |
| 243 | ACR-246                                 | Phase II  | 2024-10-29 | D2102                        | D2102        | TPBG          | Hangzhou Adcoris<br>Biopharmacy (China)                                        |
| 244 | ADCE-D01                                | Phase II  | 2025-06-05 | P1021                        | Camptothecin | MRC2; Tubulin | Adcendo APS                                                                    |
| 245 | Ado Trastuzumab<br>Emtansine biosimilar | Phase III | 2019-08-09 | DM1                          | Maytansinoid | HER2; Tubulin | Hetero Biopharma Ltd                                                           |
| 246 | ALE-P02                                 | Phase II  | 2024-10-02 | tubulin inhibitor            | Undisclosed  | CLDN1         | Alentis Therapeutics AG                                                        |
| 247 | ALE-P03                                 | Phase II  | 2025-08-26 | topoisomerase I<br>inhibitor | Camptothecin | CLDN1         | Alentis Therapeutics AG                                                        |

|     |                                                       |           |            |                |              |               |                                         |
|-----|-------------------------------------------------------|-----------|------------|----------------|--------------|---------------|-----------------------------------------|
| 248 | ALK-201                                               | Phase II  | 2024-10-24 | Exatecan       | Camptothecin | FGFR2b        | Shanghai Allink Biotherapeutics (China) |
| 249 | AMT-116                                               | Phase II  | 2024-05-07 | KL610023       | Camptothecin | CD44          | Multitude Therapeutics (China)          |
| 250 | AMT-253                                               | Phase II  | 2024-01-31 | Exatecan       | Camptothecin | MCAM; TOP1    | Multitude Therapeutics (China)          |
| 251 | Anetumab ravtansine                                   | Phase II  | 2015-12-03 | DM4            | Maytansinoid | MSLN; Tubulin | Morphosys Ag; Bayer                     |
| 252 | Anti TROP2 antibody drug conjugate ADC                | Phase II  | 2023-03-30 | Undisclosed    | Undisclosed  | Trop-2        | Fudan University                        |
| 253 | Anti-CD46 antibody drug conjugate                     | Phase II  | 2022-01-19 | MMAE           | Auristatin   | MCP; Tubulin  | Fibrogen; Fortis Therapeutics           |
| 254 | anti-HER2 ADC                                         | Phase II  | 2022-11-01 | Aur0101        | Auristatin   | HER2          | Pfizer; Fudan University                |
| 255 | Antibody–drug conjugates based pyrrolobenzodiazepines | Phase II  | 2022-09-06 | PBD            | PBD          | Updating      | AstraZeneca; Genentech                  |
| 256 | ANV-600                                               | Phase II  | 2024-05-29 | ANV419         | IL-2R agoist | IL2R          | Anaveon AG                              |
| 257 | Anvatabart opadotin                                   | Phase III | 2025-04-10 | Amberstatin269 | Auristatin   | Tubulin; HER2 | Ambrx Inc                               |
| 258 | ATG-022                                               | Phase II  | 2024-03-20 | MMAE           | Auristatin   | Claudin 18.2  | Antengene (China)                       |
| 259 | AZD-0516                                              | Phase II  | 2025-10-01 | Exatecan       | Camptothecin | STEAP2; TOP1  | AstraZeneca                             |

|     |          |           |            |                |              |                          |                                                                                          |
|-----|----------|-----------|------------|----------------|--------------|--------------------------|------------------------------------------------------------------------------------------|
| 260 | AZD-4360 | Phase II  | 2025-04-29 | Belotecan      | Camptothecin | TOP1; Claudin 18.2       | AstraZeneca                                                                              |
| 261 | AZD-4512 | Phase II  | 2025-07-07 | Undisclosed    | Undisclosed  | CD22                     | AstraZeneca                                                                              |
| 262 | AZD-9829 | Phase II  | 2024-01-31 | AZ14170132     | Camptothecin | TOP1; IL3RA              | AstraZeneca                                                                              |
| 263 | AZD5335  | Phase III | 2025-10-16 | AZ14170132     | Camptothecin | FOLR1; TOP1              | AstraZeneca                                                                              |
| 264 | BAT-8006 | Phase III | 2025-06-11 | Exatecan       | Camptothecin | FOLR1; TOP1              | Bio-Thera Solutions<br>(China)                                                           |
| 265 | BAT-8008 | Phase II  | 2024-04-12 | Exatecan       | Camptothecin | Trop-2; TOP1             | Bio-Thera Solutions<br>(China)                                                           |
| 266 | BAT-8010 | Phase II  | 2024-05-08 | TOP1i          | Camptothecin | TOP1; HER2               | Bio-Thera Solutions<br>(China)                                                           |
| 267 | BB-1701  | Phase II  | 2023-03-07 | Eribulin       | Eribulin     | HER2; TUBB1              | Bliss Biopharmaceutical<br>(China)                                                       |
| 268 | BDC-4182 | Phase II  | 2025-05-26 | TLR7/8 agonist | TLR          | Claudin 18.2;<br>Tubulin | Bolt Biotherapeutics Inc                                                                 |
| 269 | BIO-106  | Phase II  | 2022-03-25 | Tlr-7/8        | TLR          | Trop-2                   | Bionecure Therapeutics<br>(China)                                                        |
| 270 | BL-M02D1 | Phase II  | 2023-09-04 | Ed-04          | Camptothecin | Trop-2                   | Baili Bio Chengdu<br>Pharmaceutical (China);<br>Sichuan Baili<br>Pharmaceuticals (China) |

|     |                       |           |            |             |              |                  |                                                   |
|-----|-----------------------|-----------|------------|-------------|--------------|------------------|---------------------------------------------------|
| 271 | BL-M07D1              | Phase III | 2024-05-08 | Ed-04       | Camptothecin | HER2             | SystImmune; Sichuan Baili Pharmaceuticals (China) |
| 272 | BM7PE                 | Phase II  | 2020-08-31 | PE40        | PE38         | MUC1             | Oslo University Hospital                          |
| 273 | BRY-812               | Phase II  | 2025-10-24 | MMAE        | Auristatin   | ZIP6             | BioRay Biopharmaceutical (China)                  |
| 274 | Bulumtatug fuvedotin  | Phase III | 2023-12-29 | MMAE        | Auristatin   | NECTIN4; Tubulin | Mabwell (Shanghai) Bioscience (China)             |
| 275 | C225-ILS-DOX          | Phase II  | 2023-06-12 | Doxorubicin | Doxorubicin  | TOP2; EGFR       | Universitaetsspitals Basel                        |
| 276 | Camidanlumab tesirine | Phase II  | 2019-09-13 | PBD         | PBD          | DNA; IL2RA       | Adc Therapeutics Sa; Genmab A/S                   |
| 277 | Caxmotabart Entudotin | Phase III | 2023-03-28 | MMAF        | Auristatin   | HER2; Tubulin    | Legochembio; Iksuda Therapeutics                  |
| 278 | CM518D1               | Phase II  | 2025-06-03 | Undisclosed | Undisclosed  | CDH17            | Keymed Biomedical Technology                      |
| 279 | CMG-901               | Phase III | 2024-03-04 | MMAE        | Auristatin   | Claudin 18.2     | Keymed Biomedical Technology; AstraZeneca         |
| 280 | CUBT-906              | Phase II  | 2023-12-01 | PBD         | PBD          | NCAM1            | Curative Biotechnology Inc.                       |
| 281 | CX-2029               | Phase II  | 2018-06-15 | MMAE        | Auristatin   | TfR1             | Cytomx Therapeutics Inc; AbbVie                   |
| 282 | DB-1305               | Phase II  | 2022-07-19 | P1021       | Camptothecin | Trop-2; TOP1     | Duality Biologics (China)                         |
| 283 | DB-1310               | Phase II  | 2023-04-10 | P1021       | Camptothecin | HER3; TOP1       | Duality Biologics (China)                         |

|     |                              |           |            |            |              |                  |                                                                              |
|-----|------------------------------|-----------|------------|------------|--------------|------------------|------------------------------------------------------------------------------|
| 284 | DB-1311                      | Phase II  | 2023-08-17 | P1021      | Camptothecin | CD276; TOP1      | Duality Biologics (China);<br>Biontech Se; Biotheus                          |
| 285 | DB-1418                      | Phase II  | 2025-06-04 | P1021      | Camptothecin | EGFR; HER3; TOP1 | Duality Biologics (China);<br>Avenzo Therapeutics                            |
| 286 | DB-1419                      | Phase II  | 2024-09-03 | P1003      | Camptothecin | CD276; PD-L1     | Duality Biologics (China)                                                    |
| 287 | Debio-1562M                  | Phase II  | 2025-05-30 | DM1        | Maytansinoid | CD37             | Debiopharm International<br>Sa                                               |
| 288 | Depatuxizumab<br>mafodotin   | Phase III | 2015-01-04 | MMAF       | Auristatin   | EGFR; Tubulin    | AbbVie                                                                       |
| 289 | DS-3939                      | Phase II  | 2023-08-18 | Exatecan   | Camptothecin | MUC1; TOP1       | Daiichi Sankyo Inc.                                                          |
| 290 | DX126-262                    | Phase II  | 2021-11-17 | Tub114     | Tubulysin    | HER2; Tubulin    | Hangzhou DAC<br>Biotechnology (China)                                        |
| 291 | DYNE-251                     | Phase II  | 2022-08-12 | PMO        | PMO          | TfR1; DMD        | Dyne Therapeutics Inc.                                                       |
| 292 | E-EDV-D682                   | Phase II  | 2025-09-01 | PNU-159682 | Doxorubicin  | TOP2; EGFR       | Engeneic Ltd                                                                 |
| 293 | Enapotamab vedotin           | Phase II  | 2016-11-23 | MMAE       | Auristatin   | AXL; Tubulin     | Seagen Inc; Genmab A/S                                                       |
| 294 | Epratuzumab-cys-<br>tesirine | Phase II  | 2018-08-24 | PBD        | PBD          | DNA; CD22        | Adc Therapeutics Sa                                                          |
| 295 | ESG-401                      | Phase III | 2024-07-11 | SN-38      | Camptothecin | Trop-2; TOP1     | Shanghai Escugen<br>Biotechnology (China);<br>Qilu Pharmaceutical<br>(China) |

|     |                                   |           |            |             |              |                |                                                                                 |
|-----|-----------------------------------|-----------|------------|-------------|--------------|----------------|---------------------------------------------------------------------------------|
| 296 | Farletuzumab<br>ecteribulin       | Phase II  | 2020-08-06 | Eribulin    | Eribulin     | FOLR1; Tubulin | Eisai; Morphotek Inc;<br>Bristol Myers Squibb                                   |
| 297 | FDA018 Antibody Drug<br>Conjugate | Phase III | 2024-08-09 | SN-38       | Camptothecin | Trop-2         | Shanghai Fudan<br>Zhangjiang Bio<br>Pharmaceutical (China);<br>Fudan University |
| 298 | FDA022 Antibody Drug<br>Conjugate | Phase II  | 2024-05-13 | BB05        | Camptothecin | HER2           | Shanghai Fudan<br>Zhangjiang Bio<br>Pharmaceutical (China)                      |
| 299 | FS001                             | Phase II  | 2025-10-30 | Top1 i      | Camptothecin | TOP1           | Foreseen Biotechnology<br>(China); Shanghai Escugen<br>Biotechnology (China)    |
| 300 | Gancotamab                        | Phase II  | 2017-12-13 | Doxorubicin | Doxorubicin  | TOP2; HER2     | Merrimack<br>Pharmaceuticals Inc.                                               |
| 301 | Glembatumumab<br>vedotin          | Phase II  | 2006-06-01 | MMAE        | Auristatin   | Tubulin; GPNMB | Celldex Therapeutics                                                            |
| 302 | GQ-1001                           | Phase II  | 2022-10-01 | DM1         | Maytansinoid | HER2           | GeneQuantum (China)                                                             |
| 303 | GQ-1005                           | Phase III | 2024-12-01 | Topo1/Dxd   | Camptothecin | HER2; TOP1     | GeneQuantum (China);<br>Shanghai Henlius Biotech<br>(China)                     |
| 304 | GQ-1010                           | Phase II  | 2024-04-22 | Topolx      | Camptothecin | Trop-2; TOP1   | GeneQuantum (China)                                                             |
| 305 | GR-1014                           | Phase II  | 2024-07-26 | Undisclosed | Undisclosed  | Updating       | GeneQuantum (China)                                                             |

|     |             |           |            |                         |              |               |                                                                                                                               |
|-----|-------------|-----------|------------|-------------------------|--------------|---------------|-------------------------------------------------------------------------------------------------------------------------------|
| 306 | GSK-5733584 | Phase III | 2025-03-07 | HS-9265                 | Camptothecin | VTCN1; TOP1   | Changzhou Hansoh Pharmaceutical (China); GSK; Hansoh BioMedical R&D Company; 江苏豪森药业集团有限公司; Shanghai Hansoh Biomedical (China) |
| 307 | HB-0052     | Phase II  | 2024-09-01 | Undisclosed             | Undisclosed  | NT5E; TOP1    | Changzhou Hansoh Pharmaceutical (China); GSK; Hansoh BioMedical R&D Company; 江苏豪森药业集团有限公司; Shanghai Hansoh Biomedical (China) |
| 308 | HDM-2005    | Phase II  | 2025-07-09 | Camptothecin Derivative | Camptothecin | ROR1; Tubulin | Hangzhou Zhongmei Huadong Pharmaceutical (China)                                                                              |
| 309 | HDP-101     | Phase II  | 2022-02-07 | Amanitin                | Amanitin     | RNAP; BCMA    | Heidelberg Pharma AG                                                                                                          |
| 310 | HLX-43      | Phase II  | 2025-01-26 | camptothecin-based      | Camptothecin | PD-L1; TOP1   | Shanghai Henlius Biotech (China)                                                                                              |
| 311 | HMBD-501    | Phase II  | 2025-10-01 | Exatecan                | Camptothecin | HER3; TOP1    | Hummingbird Bioscience                                                                                                        |

|     |                        |           |            |              |                  |                          |                                                    |
|-----|------------------------|-----------|------------|--------------|------------------|--------------------------|----------------------------------------------------|
| 312 | HS-20093               | Phase III | 2024-07-04 | SHR-9265     | Camptothecin     | CD276; DNA topoisomerase | Shanghai Hansoh Biomedical (China)                 |
| 313 | HS-20105               | Phase II  | 2024-03-01 | SHR-9265     | Camptothecin     | Trop-2; TOP1             | Hansoh BioMedical R&D Company                      |
| 314 | HY-0001-a              | Phase II  | 2025-07-10 | MMAE         | Auristatin       | CDCP1                    | Sichuan Huiyu Seacross Pharma Technology (China)   |
| 315 | IBI-133                | Phase II  | 2024-01-16 | Exatecan     | Camptothecin     | HER3                     | Innovent Biologics (China)                         |
| 316 | IBI-3014               | Phase II  | 2025-04-18 | MB3          | Camptothecin     | Trop-2; PD-L1            | Innovent Biologics (China)                         |
| 317 | IBI-343                | Phase III | 2024-06-30 | Exatecan     | Camptothecin     | Claudin 18.2; TOP1       | Innovent Biologics (China); Takeda Pharmaceuticals |
| 318 | IBI-354                | Phase III | 2025-03-17 | Camptothecin | Camptothecin     | HER2; TOP1               | Innovent Biologics (China)                         |
| 319 | IBI129                 | Phase II  | 2024-03-12 | Undisclosed  | Camptothecin     | CD276                    | Innovent Biologics (China)                         |
| 320 | IBI130                 | Phase II  | 2023-11-14 | Undisclosed  | Camptothecin     | Trop-2                   | Innovent Biologics (China)                         |
| 321 | Ifinatamab deruxtecan  | Phase III | 2024-05-21 | Exatecan     | Camptothecin     | CD276                    | Daiichi Sankyo                                     |
| 322 | ILB-3101               | Phase II  | 2024-08-19 | Eribulin     | Eribulin         | CD276; Tubulin           | InnoLake Pharmaceuticals (China)                   |
| 323 | IRDye800CW-nimotuzumab | Phase II  | 2020-09-01 | IRDye800CW   | Photosensitizers | Not applicable           | University of Saskatchewan                         |

|     |                           |           |            |             |              |                                   |                                                         |
|-----|---------------------------|-----------|------------|-------------|--------------|-----------------------------------|---------------------------------------------------------|
| 324 | Izalontamab<br>bregitecan | Phase III | 2023-12-04 | Ed-04       | Camptothecin | EGFR; HER3; TOP1                  | Sichuan Baili<br>Pharmaceuticals (China);<br>SystImmune |
| 325 | Izeltabart tapatansine    | Phase II  | 2020-10-29 | DM21        | Maytansinoid | Tubulin; ADAM9                    | Immunogen Inc.                                          |
| 326 | JK-06                     | Phase II  | 2024-10-23 | MMAE        | Auristatin   | TPBG; Tubulin                     | Genekey Biotech                                         |
| 327 | JS-212                    | Phase II  | 2025-04-11 | Undisclosed | Undisclosed  | EGFR; HER3                        | Shanghai Junshi<br>Biosciences (China)                  |
| 328 | JSKN-003                  | Phase III | 2023-10-07 | Topo1, Dxd  | Camptothecin | HER2; TOP1                        | Alphamab Oncology<br>(China)                            |
| 329 | JSKN-016                  | Phase II  | 2025-01-17 | Topo1       | Camptothecin | Trop-2; HER3                      | Alphamab Oncology<br>(China)                            |
| 330 | JSKN-033                  | Phase II  | 2024-01-18 | Topo1       | Camptothecin | HER2; PD-L1; DNA<br>topoisomerase | Alphamab Oncology<br>(China)                            |
| 331 | KY-0301                   | Phase II  | 2025-05-01 | MMAE        | Auristatin   | c-Met; EGFR;<br>Tubulin           | Novatim Immune<br>Therapeutics (China)                  |
| 332 | Ladiratumumab vedotin     | Phase II  | 2018-02-27 | MMAE        | Auristatin   | ZIP6; Tubulin                     | Seagen Inc; MSD                                         |
| 333 | LCB-84                    | Phase II  | 2023-10-05 | MMAE        | Auristatin   | Trop-2                            | Legochem Biosciences Inc.                               |
| 334 | LM-305                    | Phase II  | 2022-12-22 | MMAE        | Auristatin   | GPRC5D; Tubulin                   | LaNova Medicines                                        |

|     |                                |           |            |               |               |                |                                                            |
|-----|--------------------------------|-----------|------------|---------------|---------------|----------------|------------------------------------------------------------|
| 335 | LM-350                         | Phase II  | 2025-09-30 | LDX2          | Camptothecin  | CDH17; TOP1    | LaNova Medicines                                           |
| 336 | Lorvotuzumab mertansine        | Phase II  | 2003-04-01 | DM1           | Maytansinoid  | NCAM1; Tubulin | Immunogen Inc.                                             |
| 337 | Lutetium-177 DOTA girentuximab | Phase II  | 2005-02-01 | 177 Lu        | Radionuclide  | CA9            | Wilex AG; Heidelberg Pharma AG; Telix Pharmaceuticals Ltd. |
| 338 | Luveltamab tazevibulin         | Phase II  | 2023-10-13 | hemiasterlin  | Hemiasterlin  | FOLR1          | Sutro Biopharma Inc.                                       |
| 339 | LY-4170156                     | Phase III | 2025-11-01 | Exatecan      | Camptothecin  | FOLR1; TOP1    | Lilly; Loxo Oncology Inc.                                  |
| 340 | Maridebart cafraglutide        | Phase III | 2025-03-12 | GLP1R agonist | GLP1R agonist | GIPR; GLP1R    | Amgen                                                      |
| 341 | MBRC-101                       | Phase II  | 2023-11-07 | MMAE          | Auristatin    | EPHA5          | MBrace Therapeutics Inc.                                   |
| 342 | MBRC-201                       | Phase II  | 2025-09-01 | Undisclosed   | Undisclosed   | Updating       | MBrace Therapeutics Inc.                                   |
| 343 | Mecbotamab vedotin             | Phase II  | 2018-02-15 | MMAE          | Auristatin    | AXL; Tubulin   | Bioatla                                                    |
| 344 | MHB-042-C                      | Phase II  | 2025-10-01 | MH30010008    | Camptothecin  | c-Met; TOP1    | Minghui Pharmaceutical (China)                             |
| 345 | MHB-048C                       | Phase II  | 2025-10-01 | MH30010008    | Camptothecin  | PSMA           | Minghui Pharmaceutical (China)                             |

|     |                       |           |            |            |              |                        |                                      |
|-----|-----------------------|-----------|------------|------------|--------------|------------------------|--------------------------------------|
| 346 | MHB-088C              | Phase III | 2025-06-04 | MH30010008 | Camptothecin | TOP1; CD276            | Minghui Pharmaceutical Pty Ltd       |
| 347 | MHB036C               | Phase II  | 2023-01-23 | MH30010008 | Camptothecin | Trop-2; TOP1           | Minghui Pharmaceutical Pty Ltd       |
| 348 | MRG-004A              | Phase III | 2025-08-01 | MMAE       | Auristatin   | TF                     | Shanghai Miracogen (China)           |
| 349 | MRG-006               | Phase II  | 2024-07-24 | Topo1      | Camptothecin | GPC3; TOP1             | Shanghai Miracogen (China)           |
| 350 | MRG-007               | Phase II  | 2025-07-25 | Exatecan   | Camptothecin | CDH17; TOP1            | Lepu Biopharma (China)               |
| 351 | Naratuximab emtansine | Phase II  | 2016-06-05 | DM1        | Maytansinoid | CD37; Tubulin          | Immunogen Inc.                       |
| 352 | OBI-902               | Phase II  | 2025-08-04 | Exatecan   | Camptothecin | Trop-2                 | OBI Pharma                           |
| 353 | OBI-992               | Phase II  | 2024-01-03 | Exatecan   | Camptothecin | Trop-2; TOP1           | Biosion                              |
| 354 | Opelkibart elmanitin  | Phase II  | 2021-07-21 | Amanitin   | Amanitin     | RNA polymerase II; KIT | Heidelberg Pharma AG                 |
| 355 | Ozuriftamab Vedotin   | Phase II  | 2018-06-27 | MMAE       | Auristatin   | ROR2; Tubulin          | Bioatla                              |
| 356 | Patritumab Deruxtecan | NDA       | 2023-12-22 | Exatecan   | Camptothecin | HER3; TOP1             | Daiichi Sankyo; Baxter Oncology GmbH |
| 357 | Pivekimab sunirine    | NDA       | 2025-09-30 | Sunirine   | PBD          | IL3RA; DNA             | Immunogen Inc; AbbVie                |

|     |                            |           |            |             |              |                   |                                                             |
|-----|----------------------------|-----------|------------|-------------|--------------|-------------------|-------------------------------------------------------------|
| 358 | Praluzatamab<br>ravtansine | Phase II  | 2017-06-01 | DM4         | Maytansinoid | CD166             | Immunogen Inc; Cytomx<br>Therapeutics Inc.                  |
| 359 | Precentabart<br>tocentecan | Phase II  | 2025-01-29 | Exatecan    | Camptothecin | CEACAM5; TOP1     | Merck                                                       |
| 360 | PRO-1160                   | Phase II  | 2023-03-15 | Exatecan    | Camptothecin | CD70              | ProfoundBio                                                 |
| 361 | PRO-1286                   | Phase II  | 2024-11-13 | Exatecan    | Camptothecin | EGFR; c-Met; TOP1 | ProfoundBio                                                 |
| 362 | Puxitatug Samrotecan       | Phase III | 2025-08-01 | AZ14170133  | Camptothecin | VTCN1             | AstraZeneca                                                 |
| 363 | PYX-201                    | Phase II  | 2025-04-15 | PF-06380101 | Auristatin   | FN                | Pfizer                                                      |
| 364 | QLS-5133                   | Phase II  | 2025-07-01 | QLS6916     | Camptothecin | CDH6; TOP1        | Qilu Pharmaceutical<br>(China)                              |
| 365 | Raludotatug<br>deruxtecan  | Phase III | 2024-02-27 | Exatecan    | Camptothecin | TOP1; CDH6        | Daiichi Sankyo                                              |
| 366 | RC-108                     | Phase II  | 2021-04-08 | MMAE        | Auristatin   | c-Met; Tubulin    | RemeGen (China)                                             |
| 367 | RC-118                     | Phase II  | 2022-03-03 | MMAE        | Auristatin   | Claudin 18.2      | RemeGen (China);<br>Biocytogen<br>Pharmaceuticals (Beijing) |
| 368 | RC-278                     | Phase II  | 2025-08-11 | Undisclosed | Undisclosed  | Updating          | RemeGen (China)                                             |
| 369 | RC-88                      | Phase II  | 2020-04-14 | MMAE        | Auristatin   | MSLN              | RemeGen (China)                                             |

|     |                      |           |            |             |              |                         |                                                             |
|-----|----------------------|-----------|------------|-------------|--------------|-------------------------|-------------------------------------------------------------|
| 370 | Rinatabart Sesutecan | Phase III | 2025-02-07 | Exatecan    | Camptothecin | FOLR1; TOP1             | ProfoundBio; Genmab A/S                                     |
| 371 | SGN-PDL1V            | Phase III | 2025-09-24 | MMAE        | Auristatin   | PD-L1; Tubulin          | Seagen Inc; Pfizer                                          |
| 372 | SHR-1681             | Phase II  | 2025-01-21 | Undisclosed | Undisclosed  | Updating                | Suzhou Suncadia Biopharmaceuticals                          |
| 373 | SHR-1826             | Phase II  | 2025-02-18 | SHR9265     | Camptothecin | c-Met                   | Suzhou Suncadia Biopharmaceuticals                          |
| 374 | SHR-4602             | Phase II  | 2024-08-01 | Eribulin    | Eribulin     | HER2                    | Suzhou Suncadia Biopharmaceuticals; 上海盛迪医药有限公司              |
| 375 | SHR-4849             | Phase II  | 2025-07-25 | SHR9265     | Camptothecin | DLL3; DNA topoisomerase | Jiangsu Hengrui (China)                                     |
| 376 | SHR-A-1904           | Phase III | 2024-07-16 | SHR9265     | Camptothecin | Claudin 18.2            | Jiangsu Hengrui (China)                                     |
| 377 | SHR-A1912            | Phase III | 2025-04-24 | SHR9265     | Camptothecin | CD79B; TOP1             | Jiangsu Hengrui (China); Suzhou Suncadia Biopharmaceuticals |
| 378 | SHR-A1921            | Phase III | 2024-02-15 | SHR9265     | Camptothecin | Trop-2                  | Jiangsu Hengrui (China); Suzhou Suncadia Biopharmaceuticals |
| 379 | SHR-A2009            | Phase III | 2024-11-29 | SHR9265     | Camptothecin | HER3                    | Jiangsu Hengrui (China); Suzhou Suncadia Biopharmaceuticals |

|     |                    |           |            |               |              |                    |                                                                   |
|-----|--------------------|-----------|------------|---------------|--------------|--------------------|-------------------------------------------------------------------|
| 380 | SHR-A2102          | Phase III | 2025-02-12 | SHR9265       | Camptothecin | NECTIN4; TOP1      | Jiangsu Hengrui (China);<br>Suzhou Suncadia<br>Biopharmaceuticals |
| 381 | Sigvotatug vedotin | Phase III | 2024-02-21 | MMAE          | Auristatin   | ITGB6; Tubulin     | Seagen Inc; Pfizer                                                |
| 382 | SKB-315            | Phase II  | 2024-02-28 | KL610023      | Camptothecin | Claudin 18.2; TOP1 | Sichuan Kelun Botai<br>Biomedicine (China)                        |
| 383 | SKB-410            | Phase II  | 2025-03-25 | KL610023      | Camptothecin | NECTIN4            | Sichuan Kelun Botai<br>Biomedicine (China)                        |
| 384 | SKB-518            | Phase II  | 2025-06-05 | Undisclosed   | Undisclosed  | PTK7               | Sichuan Kelun Botai<br>Biomedicine (China)                        |
| 385 | SKB-571            | Phase II  | 2025-10-20 | DXd           | Camptothecin | EGFR; c-Met        | Sichuan Kelun Botai<br>Biomedicine (China)                        |
| 386 | SLC-3010           | Phase II  | 2022-12-21 | IL-2          | IL-2R agoist | IL2R               | Selexine Inc                                                      |
| 387 | SOT-102            | Phase II  | 2022-03-31 | PNU-159682    | Doxorubicin  | Claudin 18.2       | Sotio Biotech AG                                                  |
| 388 | SQ-3370            | Phase II  | 2020-08-01 | Doxorubicin   | Doxorubicin  | DNA; TOP2          | Shasqi Inc.                                                       |
| 389 | STI-6129           | Phase II  | 2021-04-01 | Duostatin-5.2 | Auristatin   | CD38               | Sorrento Therapeutics Inc.                                        |
| 390 | SYS-6002           | Phase II  | 2024-04-01 | MMAE          | Auristatin   | NECTIN4; Tubulin   | CSPC Megalith<br>Biopharmaceutial (China);<br>CSPC (China)        |

|     |                          |           |            |                   |              |                       |                                                  |
|-----|--------------------------|-----------|------------|-------------------|--------------|-----------------------|--------------------------------------------------|
| 391 | SYS-6010                 | Phase III | 2024-08-26 | JS-1              | Camptothecin | EGFR                  | CSPC Megalith Biopharmaceutical (China)          |
| 392 | SYS-6043                 | Phase II  | 2025-10-24 | Top1 i            | Camptothecin | CD276                 | CSPC Megalith Biopharmaceutical (China)          |
| 393 | SYS-6045                 | Phase II  | 2025-08-01 | tubulin inhibitor | Undisclosed  | HER2; Tubulin         | CSPC Megalith Biopharmaceutical (China)          |
| 394 | SYSA-1801                | Phase III | 2024-12-23 | MMAE              | Auristatin   | Claudin 18.2; Tubulin | CSPC Megalith Biopharmaceutical (China)          |
| 395 | Tabirafusp tedromer      | Phase III | 2024-08-23 | Tedromer          | Tedromer     | IL6; VEGF             | Kodiak Sciences Inc.                             |
| 396 | TAC-001                  | Phase II  | 2022-06-28 | TLR9 agonist      | TLR          | TLR9; CD22            | Tallac Therapeutics Inc.                         |
| 397 | TAK- 188                 | Phase II  | 2025-09-26 | Undisclosed       | Undisclosed  | CCR8                  | Takeda Pharmaceutical                            |
| 398 | Tecotabart vedotin       | Phase III | 2024-06-24 | MMAE              | Auristatin   | Claudin 18.2; Tubulin | LaNova Medicines                                 |
| 399 | Telisotuzumab adizutecan | Phase III | 2024-11-08 | A-1743332         | Camptothecin | c-Met; TOP1           | AbbVie                                           |
| 400 | TORL-1-23                | Phase II  | 2024-11-20 | MMAE              | Auristatin   | CLDN6; Tubulin        | Torl Biotherapeutics LLC                         |
| 401 | TQB-2102                 | Phase III | 2024-08-01 | DXd               | Camptothecin | HER2; TOP1            | Nanjing Chia Tai Tianqing Pharmaceutical (China) |

|     |                          |           |            |           |              |                  |                                          |
|-----|--------------------------|-----------|------------|-----------|--------------|------------------|------------------------------------------|
| 402 | Trastuzumab duocarmazine | NDA       | 2022-07-18 | seco-DUBA | Duocarmycin  | HER2; DNA        | Synthon Bv; Medac Gmbh                   |
| 403 | Trastuzumab envedotin    | Phase III | 2023-07-01 | MMAE      | Auristatin   | HER2; Tubulin    | CSPC Megalith Biopharmaceutical (China)  |
| 404 | Trastuzumab pamirtecan   | Phase III | 2024-01-18 | P1003     | Camptothecin | HER2;TOP1        | Duality Biologics (China); 3SBio         |
| 405 | Trastuzumab vedotin      | Phase III | 2021-06-30 | MMAE      | Auristatin   | HER2; Tubulin    | Shanghai Miracogen (China)               |
| 406 | Trop2-ADC                | Phase II  | 2025-03-01 | DXd       | Camptothecin | Trop-2           | Sun Yat-Sen Memorial Hospital            |
| 407 | TRS-005                  | Phase II  | 2025-09-01 | MMAE      | Auristatin   | CD20; Tubulin    | Zhejiang Teruisi Pharmaceutical (China)  |
| 408 | TUB-030                  | Phase II  | 2024-12-13 | Exatecan  | Camptothecin | TOP1; TPBG       | Tubulis GmbH                             |
| 409 | TUB-040                  | Phase II  | 2024-06-12 | Exatecan  | Camptothecin | NaPi-2b          | Tubulis GmbH                             |
| 410 | Tusamitamab Ravtansine   | Phase III | 2020-02-06 | DM4       | Maytansinoid | CEACAM5; Tubulin | Immunogen Inc; Sanofi                    |
| 411 | Upinitatug rilsodotin    | Phase II  | 2017-12-12 | AF-HPA    | Auristatin   | NaPi-2b          | Mersana Therapeutics Inc; Adimab LLC.    |
| 412 | VBC-101-F11              | Phase II  | 2025-09-23 | MMAE      | Auristatin   | EGFR; c-Met      | Velavigo Shanghai Pharmaceutical (China) |
| 413 | VBC-103                  | Phase II  | 2025-10-01 | TOPOi     | Topo         | Trop-2; NECTIN4  | VelaVigo Cayman Ltd.                     |

|     |                              |           |            |              |              |               |                                                   |
|-----|------------------------------|-----------|------------|--------------|--------------|---------------|---------------------------------------------------|
| 414 | VBP-101                      | Phase II  | 2024-09-01 | Undisclosed  | Undisclosed  | CD33          | Vor Biopharma Inc.                                |
| 415 | Vobramitamab<br>duocarmazine | Phase II  | 2023-06-13 | seco-DUBA    | Duocarmycin  | CD276; DNA    | Macrogenics Inc.                                  |
| 416 | WEF-001                      | Phase II  | 2025-07-28 | MMAE         | Auristatin   | Updating      | Auricula Biosciences Inc.                         |
| 417 | XNW-27011                    | Phase III | 2025-08-12 | Camptothecin | Camptothecin | Claudin 18.2  | Evopoint Biosciences<br>(China); Astellas Pharma  |
| 418 | XNW-28012                    | Phase III | 2025-07-23 | YL0014       | Camptothecin | TF            | Evopoint Biosciences<br>(China)                   |
| 419 | <u>XYD-9668-198</u>          | Phase II  | 2023-05-22 | 198          | Camptothecin | Trop-2        | Kunshan Xinyunda<br>Biotechnology (China)         |
| 420 | YL-201                       | Phase III | 2024-12-17 | YL0010014    | Camptothecin | CD276; TOP1   | Suzhou Medilink<br>Therapeutics (China);<br>Amgen |
| 421 | YL-202                       | Phase II  | 2023-12-15 | YL0010015    | Camptothecin | HER3; TOP1    | Suzhou Medilink<br>Therapeutics (China)           |
| 422 | YL-205                       | Phase II  | 2024-06-04 | YL0010016    | Camptothecin | TOP1; NaPi-2b | Suzhou Medilink<br>Therapeutics (China)           |
| 423 | YL-242                       | Phase II  | 2025-09-10 | C24          | C24          | VEGF; TOP1    | Suzhou Medilink<br>Therapeutics (China)           |
| 424 | YLSH-003                     | Phase II  | 2025-10-21 | Topo1        | Camptothecin | Updating      | Chengdu Easton<br>Biopharmaceuticals<br>(China)   |

|     |                        |            |            |                  |                  |                   |                                                       |
|-----|------------------------|------------|------------|------------------|------------------|-------------------|-------------------------------------------------------|
| 425 | Zilovertamab vedotin   | Phase III  | 2022-01-14 | MMAE             | Auristatin       | ROR1; Tubulin     | Velosbio Inc; Merck Sharp & Dohme LLC                 |
| 426 | Zocilurtatug pelitecan | Phase III  | 2025-10-08 | Camptothecin     | Camptothecin     | DLL3; TOP1        | Zai Lab (China); Suzhou Medilink Therapeutics (China) |
| 427 | 89Zr-TAK-164           | terminated | 2018-04-23 | DGN549           | PBD              | DNA; GUCY2C       | Immunogen Inc; Takeda Pharmaceutical                  |
| 428 | ABBV-787               | terminated | 2023-11-13 | BET degrader     | BET degrader     | CD33; BET         | AbbVie                                                |
| 429 | AbGn-107               | terminated | 2017-04-24 | Auristatin       | Auristatin       | Not applicable    | Altrubio Inc.                                         |
| 430 | AbGn-7                 | stalled    | 2011-11-01 | Immunomodulators | Immunomodulators | Not applicable    | Altrubio Inc.                                         |
| 431 | ADCT-502               | terminated | 2017-05-18 | SG3199           | PBD              | HER2; DNA         | Cancer Research Technology; Adc Therapeutics Sa       |
| 432 | AGS-16C3F              | stalled    | 2016-05-03 | MMAF             | Auristatin       | Tubulin; ENPP3    | Agensys Inc.                                          |
| 433 | AGS-5-ME               | stalled    | 2010-07-01 | MMAE             | Auristatin       | CTL4; Tubulin     | Seagen Inc; Agensys Inc.                              |
| 434 | AGS-62P1               | terminated | 2016-11-10 | Amberstatin      | Auristatin       | FLT3              | Ambrx Inc.                                            |
| 435 | AMG-172                | stalled    | 2012-01-01 | DM1              | Maytansinoid     | CD70; Tubulin     | Amgen                                                 |
| 436 | AMG-595                | stalled    | 2012-02-01 | DM1              | Maytansinoid     | EGFRvIII; Tubulin | Amgen                                                 |

|     |                                                                   |            |            |              |                  |                 |                                   |
|-----|-------------------------------------------------------------------|------------|------------|--------------|------------------|-----------------|-----------------------------------|
| 437 | Anti-c-kit humanised IgG1/κ antibody-maitansine conjugate         | terminated | 2014-12-01 | DM1          | Maytansinoid     | KIT; Tubulin    | Beijing Novartis Pharma (China)   |
| 438 | Anti-CD3 ricin chain A conjugate/anti-CD7 ricin chain A conjugate | terminated | 2019-11-21 | Ricin A      | Immunotoxin      | CD3; CD7        | Radboud University Medical Center |
| 439 | antibody drug conjugate program 1 for cancer                      | stalled    | 2016-09-24 | Undisclosed  | Undisclosed      | Updating        | AbbVie                            |
| 440 | Aprutumab ixadotin                                                | terminated | 2015-03-24 | Auristatin   | Auristatin       | FGFR2; Tubulin  | Bayer                             |
| 441 | AVE-9633                                                          | stalled    | 2007-09-01 | DM4          | Maytansinoid     | CD33            | Immunogen Inc.                    |
| 442 | AVID-100                                                          | terminated | 2017-02-01 | DM1          | Maytansinoid     | EGFR            | Formation Biologics Corp          |
| 443 | Azintuxizumab vedotin                                             | terminated | 2015-05-06 | MMAE         | Auristatin       | SLAMF7; Tubulin | AbbVie                            |
| 444 | Basiliximab sarotalocan                                           | terminated | 2022-03-24 | IR700        | Photosensitizers | IL2RA           | Rakuten Medical Inc.              |
| 445 | BAT-8001                                                          | terminated | 2018-07-01 | Maytansinoid | Maytansinoid     | Tubulin; HER2   | Bio-Thera Solutions (China)       |
| 446 | BAT-8003                                                          | terminated | 2019-03-15 | Batansine    | Maytansinoid     | Trop-2          | Bio-Thera Solutions (China)       |
| 447 | BAY-794620                                                        | terminated | 2009-11-01 | MMAE         | Auristatin       | CA9             | Bayer                             |

|     |                        |            |            |                  |                  |                   |                               |
|-----|------------------------|------------|------------|------------------|------------------|-------------------|-------------------------------|
| 448 | BIIB-015               | stalled    | 2008-06-01 | DM4              | Maytansinoid     | Cripto-1; Tubulin | Biogen MA                     |
| 449 | Bivatuzumab mertansine | terminated | 2002-09-01 | DM1              | Maytansinoid     | CD44              | Immunogen Inc.                |
| 450 | BMS-986148             | terminated | 2015-06-19 | tubulyisin       | Tubulyisin       | MSLN              | Bristol Myers Squibb          |
| 451 | Cantuzumab mertansine  | terminated | 2004       | DM1              | Maytansinoid     | MUC1              | Immunogen Inc.                |
| 452 | Cantuzumab ravtansine  | terminated | 2007-05-01 | DM4              | Maytansinoid     | CanAg; MUC1       | Immunogen Inc.                |
| 453 | CDH17 - IHC Test       | stalled    | 2024-08-01 | undisclosed      | Undisclosed      | CDH17             | Arbele Corp                   |
| 454 | CDX-014                | terminated | 2016-06-01 | MMAE             | Auristatin       | TIM1; Tubulin     | Curagen Corporation;<br>Amgen |
| 455 | CHB 111                | terminated | 2009       | Immunostimulants | Immunostimulants | Not applicable    | Virexx Medical Corp           |
| 456 | CMB-401                | terminated | 2003       | Calicheamicin    | Calicheamicin    | MUC1; DNA         | Celltech                      |
| 457 | CMD-193                | terminated | 2004-11-01 | Calicheamicin    | Calicheamicin    | Lewis-Y antigen   | Wyeth Pharmaceuticals<br>Ltd. |
| 458 | Coltuximab ravtansine  | terminated | 2011-10-01 | DM4              | Maytansinoid     | CD19; Tubulin     | Immunogen Inc.                |
| 459 | DCLL-9718S             | stalled    | 2017-11-15 | PBD              | PBD              | CLEC12A           | Roche                         |
| 460 | Denintuzumab mafodotin | terminated | 2015-10-01 | MMAF             | Auristatin       | CD19; Tubulin     | Seagen Inc.                   |

|     |                                       |            |             |              |                  |                                              |                                 |
|-----|---------------------------------------|------------|-------------|--------------|------------------|----------------------------------------------|---------------------------------|
| 461 | Df-IA2BM-Zr-89                        | terminated | 2013-08-01  | 89Zr         | Radionuclide     | PSMA                                         | Imaginab Inc.                   |
| 462 | DS-6157                               | terminated | 2020-05-08  | Exatecan     | Camptothecin     | GPR20                                        | Daiichi Sankyo                  |
| 463 | EGFRvIII/MMAE antibody drug conjugate | stalled    | 2023        | MMAE         | Auristatin       | Tubulin; EGFRvIII                            | Abgenix Incorporated            |
| 464 | Eramkafusp alfa                       | terminated | 2016-05-01  | FNAR agonist | FNAR agonist     | CD20; IFN- $\alpha$                          | Immunogen Inc.                  |
| 465 | HIV vaccine                           | stalled    | 2010-05-01  | HIV vaccine  | Immunostimulants | Not applicable                               | Celldex Therapeutics            |
| 466 | HKT-288                               | terminated | 2016-12-01  | DM4          | Maytansinoid     | DNA; CDH6                                    | Beijing Novartis Pharma (China) |
| 467 | HTI-1066                              | stalled    | 2017-12-31  | SHR152852    | Camptothecin     | c-Met                                        | Jiangsu Hengrui (China)         |
| 468 | Iladatumab vedotin                    | stalled    | 2015-08-04  | MMAE         | Auristatin       | Tubulin; CD79B                               | Roche                           |
| 469 | IMGN 388                              | stalled    | 2008-06-01  | DM4          | Maytansinoid     | ITGAV&ITGB3; Microtubule-associated proteins | Immunogen Inc; Centocor         |
| 470 | IMGN-779                              | stalled    | 2016-03-01  | DGN462       | PBD              | CD33                                         | Immunogen Inc.                  |
| 471 | Immunoconjugate                       | terminated | undisclosed | undisclosed  | Undisclosed      | Not applicable                               | Bayer                           |
| 472 | Indatuximab ravtansine                | stalled    | 2010-08-01  | DM4          | Maytansinoid     | SDC1; Tubulin                                | Biotest Pharma GmbH             |

|     |                        |            |            |              |                   |                  |                                                |
|-----|------------------------|------------|------------|--------------|-------------------|------------------|------------------------------------------------|
| 473 | Indusatumab vedotin    | terminated | 2014-07-02 | MMAE         | Auristatin        | GUCY2C; Tubulin  | Millennium Pharmaceuticals Inc;<br>Seagen Inc. |
| 474 | Ispectamab debotansine | terminated | 2019-08-26 | Maytansinoid | Maytansinoid      | BCMA             | Celgene                                        |
| 475 | JBH-492                | terminated | 2020-09-07 | DM4          | Maytansinoid      | CCR7             | Beijing Novartis Pharma (China)                |
| 476 | L-DOS-47               | terminated | 2012-05-01 | Urease       | Urease            | CEACAM6          | Helix Biopharma                                |
| 477 | Labetuzumab govitecan  | terminated | 2000-02-01 | SN-38        | Camptothecin      | CEACAM5; TOP1    | Immunomedics; Ibc Pharmaceuticals Inc.         |
| 478 | Laprituximab emtansine | terminated | 2013-10-01 | DM1          | Maytansinoid      | EGFR; Tubulin    | Immunogen Inc.                                 |
| 479 | Lifastuzumab vedotin   | terminated | 2014-02-06 | MMAE         | Auristatin        | NaPi-2b; Tubulin | Genentech                                      |
| 480 | LM-364                 | suspended  | 2025-08-01 | Undisclosed  | Undisclosed       | Updating         | LaNova Medicines                               |
| 481 | lonigutamab ugodotin   | terminated | 2017-11-24 | F554443      | IGF1R antagonists | IGF1R            | Pierre Fabre Group                             |
| 482 | LY-256787              | terminated | 1991-05-01 | DAVLB        | Auristatin        | Tubulin          | Lilly                                          |
| 483 | LY-3076226             | stalled    | 2015-09-01 | DM4          | Maytansinoid      | FGFR3; Tubulin   | Lilly                                          |
| 484 | MDX-1203               | stalled    | 2009-07-01 | MED-A        | Duocarmycin       | CD70; DNA        | Bristol Myers Squibb                           |

|     |                                             |            |            |                                    |                  |                        |                                                |
|-----|---------------------------------------------|------------|------------|------------------------------------|------------------|------------------------|------------------------------------------------|
| 485 | MEDI-3726                                   | stalled    | 2017-01-06 | PBD                                | PBD              | DNA                    | Medimmune; Adc Therapeutics Sa                 |
| 486 | MEDI-4276                                   | stalled    | 2015-09-23 | AZ13599185                         | Auristatin       | HER2                   | Medimmune Llc.                                 |
| 487 | MEDI-547                                    | terminated | 2009-08-01 | MMAF                               | Auristatin       | EphA2                  | AstraZeneca                                    |
| 488 | Milatumumab doxorubicin                     | terminated | 2010-07-01 | Doxorubicin                        | Doxorubicin      | TOP2; DNA; HLA-DR      | Immunomedics Inc.                              |
| 489 | Mipasetamab uzoptirine                      | terminated | 2018-12-21 | SG3199                             | PBD              | DNA; AXL               | Adc Therapeutics Sa                            |
| 490 | MLN-2704                                    | terminated | 2003-10-01 | DM1                                | Maytansinoid     | Tubulin                | Immunogen Inc; Millennium Pharmaceuticals Inc. |
| 491 | MM-310                                      | stalled    | 2017-02-22 | Taxol                              | Taxol            | EphA2; Ephrin receptor | Merrimack Pharmaceuticals Inc.                 |
| 492 | Monoclonal antibody B43 Genistein-conjugate | terminated | 2000-03-01 | RTK inhibitor                      | RTK i            | CD19; RPTKs            | University Of Minnesota; Bristol Myers Squibb  |
| 493 | MT-6402                                     | terminated | 2021-05-27 | Cytotoxic T lymphocytes stimulants | Immunostimulants | PD-L1                  | Molecular Templates Inc.                       |
| 494 | NBE-002                                     | terminated | 2020-06-19 | PNU-159682                         | Doxorubicin      | ROR1                   | Nbe-Therapeutics Ag                            |

|     |                           |            |            |               |                |                            |                                 |
|-----|---------------------------|------------|------------|---------------|----------------|----------------------------|---------------------------------|
| 495 | NJH-395                   | stalled    | 2018-12-27 | TLR7 agonist  | TLR            | HER2; TLR7                 | Beijing Novartis Pharma (China) |
| 496 | NNV-019                   | suspended  | 2019-03-03 | Undisclosed   | Undisclosed    | CD37                       | Nordic Nanovector Asa           |
| 497 | OBI-999                   | terminated | 2019-11-25 | MMAE          | Auristatin     | Tubulin; Glycosphingolipid | OBI Pharma                      |
| 498 | ORM-5029                  | terminated | 2022-10-03 | SMol006       | GSPT1 degrader | GSPT1; HER2                | Orum Therapeutics Inc.          |
| 499 | PCA-062                   | stalled    | 2015-04-15 | DM1           | Maytansinoid   | CDH3                       | Beijing Novartis Pharma (China) |
| 500 | Pertuzumab<br>zuvotolimod | terminated | 2022-02-08 | TLR8 agonist  | TLR            | TLR8; HER2                 | Silverback Therapeutics Inc.    |
| 501 | PF-06263507               | terminated | 2013-08-08 | MMAF          | Auristatin     | TPBG; Tubulin              | Oxford Biomedica Plc            |
| 502 | PF-06650808               | terminated | 2014-06-01 | Aur0101       | Auristatin     | NOTCH3; Tubulin            | Pfizer                          |
| 503 | PF-06664178               | terminated | 2014-08-01 | Aur0101       | Auristatin     | Trop-2                     | Pfizer                          |
| 504 | PF-0667263                | terminated | 2014-04-09 | Calicheamicin | Calicheamicin  | EFNA4                      | Pfizer                          |
| 505 | PF-06688992               | stalled    | 2017-05-16 | Aur0101       | Auristatin     | Ganglioside                | Pfizer                          |
| 506 | Pinatuzumab vedotin       | stalled    | 2012-09-27 | MMAE          | Auristatin     | Tubulin; CD22              | Genentech                       |

|     |                     |            |            |             |                  |                |                                                                            |
|-----|---------------------|------------|------------|-------------|------------------|----------------|----------------------------------------------------------------------------|
| 507 | PRO-1107            | terminated | 2024-01-29 | MMAE        | Auristatin       | PTK7           | ProfoundBio                                                                |
| 508 | PSMA ADC            | stalled    | 2012-09-01 | MMAE        | Auristatin       | PSMA; Tubulin  | Progenics Pharmaceuticals Inc; Psma Development Company Llc.               |
| 509 | REGN-5093-M114      | terminated | 2021-11-09 | M24         | Maytansinoid     | c-Met; Tubulin | Regeneron Pharmaceuticals                                                  |
| 510 | RFB4-SMPT-dgA       | stalled    | 1991-07-01 | dgA         | Immunotoxin      | CD22           | National Cancer Institute; University of Texas Southwestern Medical Center |
| 511 | RG 7598             | stalled    | 2011-09-01 | MMAE        | Auristatin       | Tubulin        | Genentech                                                                  |
| 512 | RG-7600             | stalled    | 2011-11-01 | MMAE        | Auristatin       | MSLN; Tubulin  | Genentech                                                                  |
| 513 | RG-7636             | stalled    | 2012-03-01 | MMAE        | Auristatin       | ETBR; Tubulin  | Genentech                                                                  |
| 514 | RG-7841             | stalled    | 2014-04-01 | MMAE        | Auristatin       | Tubulin; LY6E  | Genentech                                                                  |
| 515 | RG-7861             | stalled    | 2015-11-29 | dmDNA31     | Immunostimulants | Not applicable | Genentech                                                                  |
| 516 | RG-7882             | stalled    | 2008-09-01 | MMAE        | Auristatin       | MUC16          | Genentech                                                                  |
| 517 | RG-7986             | terminated | 2018       | Undisclosed | Undisclosed      | Not applicable | Seagen Inc; Genentech                                                      |
| 518 | Rituximab conjugate | stalled    | 2013-06-01 | Undisclosed | Undisclosed      | CD20           | Biointegrator Llc.                                                         |

|     |                            |            |            |              |              |                 |                                           |
|-----|----------------------------|------------|------------|--------------|--------------|-----------------|-------------------------------------------|
| 519 | Rolinsatamab talirine      | terminated | 2017-07-03 | SGD-1882     | PBD          | PRLR; DNA       | AbbVie                                    |
| 520 | Rovalpituzumab<br>tesirine | terminated | 2017-02-07 | SCX          | PBD          | DLL3; DNA       | AbbVie; Stemcentrx Inc.                   |
| 521 | Samrotamab vedotin         | stalled    | 2015-09-18 | MMAE         | Auristatin   | LRRC15; Tubulin | AbbVie                                    |
| 522 | SAR-428926                 | stalled    | 2015-10-05 | DM4          | Maytansinoid | LAMP1; Tubulin  | Immunogen Inc; Sanofi                     |
| 523 | SAR-566658                 | terminated | 2017-03-23 | DM4          | Maytansinoid | Tubulin; MUC1   | Immunogen Inc.                            |
| 524 | SBT-6290                   | terminated | 2022-03-01 | TLR8 agonist | TLR          | TLR8; NECTIN4   | Silverback Therapeutics<br>Inc.           |
| 525 | SC-002                     | terminated | 2015-06-01 | PBD          | PBD          | TAA;            | Stemcentrx Inc.                           |
| 526 | SC-004                     | terminated | 2017-06-14 | PBD          | PBD          | CLDN9; CLDN6;   | Taisho Pharmaceutical<br>Holdings Co Ltd. |
| 527 | SC-005                     | terminated | 2018-01-04 | Undisclosed  | Undisclosed  | TAA             | AbbVie                                    |
| 528 | SC-006                     | terminated | 2017-03-08 | PBD          | PBD          | DNA             | AbbVie                                    |
| 529 | SC-007                     | terminated | 2017-09-13 | Undisclosed  | Undisclosed  | Not applicable  | AbbVie; Stemcentrx Inc.                   |
| 530 | SGN-15                     | terminated | 2000-10-01 | Doxorubicin  | Doxorubicin  | Lewis-Y antigen | Seagen Inc; Bristol Myers<br>Squibb       |

|     |                     |            |            |             |              |                  |                                         |
|-----|---------------------|------------|------------|-------------|--------------|------------------|-----------------------------------------|
| 531 | SGN-ALPV            | terminated | 2022-04-21 | MMAE        | Auristatin   | ALPP; Tubulin    | Seagen Inc.                             |
| 532 | SGN-CD123A          | terminated | 2016-08-01 | PBD         | PBD          | DNA; IL3RA       | Seagen Inc.                             |
| 533 | SGN-CD19B           | terminated | 2016-02-01 | SGD-1882    | PBD          | CD19; DNA        | Seagen Inc.                             |
| 534 | SGN-CD228A          | terminated | 2019-09-03 | MMAE        | Auristatin   | MELTF; Tubulin   | Seagen Inc.                             |
| 535 | SGN-CD352A          | terminated | 2016-12-01 | PBD         | PBD          | SLAMF6; DNA      | Ligand Pharmaceuticals Inc; Seagen Inc. |
| 536 | SGN-CD47M           | terminated | 2019-07-17 | Undisclosed | Undisclosed  | CD47             | Seagen Inc.                             |
| 537 | SGN-CD48A           | terminated | 2018-02-20 | MMAE        | Auristatin   | CD48; Tubulin    | Seagen Inc.                             |
| 538 | SGN-CD70A           | stalled    | 2014-08-01 | PBD         | PBD          | CD70; DNA        | Seagen Inc.                             |
| 539 | SHR-A1403           | stalled    | 2019-02-13 | SHR152852   | Camptothecin | Tubulin; c-Met   | Jiangsu Hengrui (China);                |
| 540 | sirtratumab vedotin | stalled    | 2013-11-14 | MMAE        | Auristatin   | SLITRK6; Tubulin | Agensys Inc; Seagen Inc.                |
| 541 | Sofituzumab vedotin | stalled    | 2011-04-01 | MMAE        | Auristatin   | MUC16; Tubulin   | Genentech                               |
| 542 | TAA-013             | terminated | 2020-07-22 | DM1         | Maytansinoid | HER2             | Tot Biopharm (China)                    |
| 543 | TAK-164             | terminated | 2018-04-23 | DGN549      | PBD          | DNA; GUCY2C      | Immunogen Inc; Takeda Pharmaceutical    |

|     |                                       |            |            |                  |                  |                 |                                          |
|-----|---------------------------------------|------------|------------|------------------|------------------|-----------------|------------------------------------------|
| 544 | TAK-500                               | terminated | 2022-04-14 | TAK-676          | STING            | STING; CCR2     | Takeda Pharmaceutical                    |
| 545 | Tamrintamab pamoizirine               | terminated | 2015-08-01 | SC-DR002         | PBD              | DPEP3           | AbbVie; Stemcentrx Inc.                  |
| 546 | Technetium[99mTc] Monoclonal Antibody | terminated | 1990       | 99mTc            | Radionuclide     | Not applicable  | The Shanghai Cancer Institute            |
| 547 | TR1801-ADC                            | stalled    | 2019-08-14 | SG3199           | PBD              | c-Met           | Tanabe Research Laboratories U.S.A. Inc. |
| 548 | Trastuzumab conjugate                 | terminated | 2016-09-01 | ADCC             | Immunomodulators | HER2            | Biointegrator LLC                        |
| 549 | Tubutecan antibody drug conjugate     | stalled    | 2025-05-20 | Exatecan         | Camptothecin     | TOP1            | Tubulis GmbH                             |
| 550 | Undisclosed antibody-drug conjugate   | stalled    | 2016       | Immunomodulators | Immunomodulators | Not applicable  | AbbVie; Seagen Inc.                      |
| 551 | Vadastuximab talirine                 | terminated | 2016-05-01 | PBD              | PBD              | CD33; DNA       | Seagen Inc.                              |
| 552 | Vandortuzumab vedotin                 | stalled    | 2011-03-01 | MMAE             | Auristatin       | Tubulin; STEAP1 | Genentech                                |
| 553 | Vorsetuzumab mafodotin                | terminated | 2009-11-01 | MMAF             | Auristatin       | Tubulin; CD70   | Seagen Inc.                              |
| 554 | XMT-1522                              | stalled    | 2016-11-21 | AF-HPA           | Auristatin       | HER2            | Mersana Therapeutics Inc; Adimab LLC     |
| 555 | XMT-1592                              | terminated | 2020-05-11 | MMAF             | Auristatin       | NaPi-2b         | Mersana Therapeutics Inc.                |
